1  
2  
3  
4  
5  
6  
7  
8  
9  
10  
11  
12  
13  
14  
15  
16  
17  
18  
19  
20  
21  
22  
23  
24  
25  
26  
27  
28  
29  
30  
31  
32  
33  
34  
35  
36  
37  
38  
39  
40  
41  
42  
43  
44  
45  
46  
47

## Towards understanding how we pay attention in naturalistic visual search settings

Nora Turoman<sup>1,2,3</sup>, Ruxandra I. Tivadar<sup>1,4,5</sup>, Chrysa Retsa<sup>1,6</sup>, Micah M. Murray<sup>1,4,6,7</sup>, Pawel J. Matusz<sup>1,2,7\*</sup>

<sup>1</sup>The LINE (Laboratory for Investigative Neurophysiology), Department of Radiology, Lausanne University Hospital and University of Lausanne, Lausanne, Switzerland

<sup>2</sup>MEDGIFT Lab, Institute of Information Systems, School of Management, HES-SO Valais-Wallis University of Applied Sciences and Arts Western Switzerland, Techno-Pôle 3, 3960 Sierre, Switzerland

<sup>3</sup>Working Memory, Cognition and Development lab, Department of Psychology and Educational Sciences, University of Geneva, Geneva, Switzerland

<sup>4</sup>Department of Ophthalmology, Fondation Asile des Aveugles, Lausanne, Switzerland

<sup>5</sup>Cognitive Computational Neuroscience group, Institute of Computer Science, Faculty of Science, University of Bern, Switzerland

<sup>6</sup>CIBM Center for Biomedical Imaging, Lausanne University Hospital and University of Lausanne, Lausanne, Switzerland

<sup>7</sup>Department of Hearing and Speech Sciences, Vanderbilt University, Nashville, TN, USA

\* Corresponding author:

Pawel Matusz

Information Systems Institute

University of Applied Sciences Western Switzerland (HES-SO Valais)

Rue Technopole 3

3960 Sierre, Switzerland

Tel: +41 27 606 9060

Author contributions:

Nora Turoman: Investigation, Formal analysis, Data curation, Software, Visualisation, Writing - original draft, Writing - review & editing.

Ruxandra I. Tivadar: Software, Writing - review & editing.

Chrysa Retsa: Software, Writing - review & editing.

Pawel J. Matusz: Conceptualization, Funding acquisition, Methodology, Resources, Formal analysis, Software, Supervision, Writing - review & editing.

Micah M. Murray: Funding acquisition, Methodology, Resources, Formal analysis, Software, Supervision, Writing - review & editing.

Conflict of interest statement:

The authors declare that the research was conducted in the absence of any commercial or financial relationships that could be construed as a potential conflict of interest.

48

49

## Abstract

50

51 Research on attentional control has largely focused on single senses and the importance of  
52 behavioural goals in controlling attention. However, everyday situations are multisensory  
53 and contain regularities, both likely influencing attention. We investigated how visual  
54 attentional capture is simultaneously impacted by top-down goals, the multisensory nature  
55 of stimuli, *and* the contextual factors of stimuli's semantic relationship and temporal  
56 predictability. Participants performed a multisensory version of the Folk et al. (1992) spatial  
57 cueing paradigm, searching for a target of a predefined colour (e.g. a red bar) within an  
58 array preceded by a distractor. We manipulated: 1) stimuli's goal-relevance via distractor's  
59 colour (matching vs. mismatching the target), 2) stimuli's multisensory nature (colour  
60 distractors appearing alone vs. with tones), 3) the relationship between the distractor sound  
61 and colour (arbitrary vs. semantically congruent) and 4) the temporal predictability of  
62 distractor onset. Reaction-time spatial cueing served as a behavioural measure of  
63 attentional selection. We also recorded 129-channel event-related potentials (ERPs),  
64 analysing the distractor-elicited N2pc component both canonically and using a multivariate  
65 electrical neuroimaging framework. Behaviourally, arbitrary target-matching distractors  
66 captured attention more strongly than semantically congruent ones, with no evidence for  
67 context modulating multisensory enhancements of capture. Notably, electrical  
68 neuroimaging of surface-level EEG analyses revealed context-based influences on attention  
69 to both visual and multisensory distractors, in how strongly they activated the brain and  
70 type of activated brain networks. For both processes, the context-driven brain response  
71 modulations occurred long before the N2pc time-window, with topographic (network-  
72 based) modulations at ~30ms, followed by strength-based modulations at ~100ms post-  
73 distractor onset. Our results reveal that both stimulus meaning and predictability modulate  
74 attentional selection, and they interact while doing so. Meaning, in addition to temporal  
75 predictability, is thus a second source of contextual information facilitating goal-directed  
76 behaviour. More broadly, in everyday situations, attention is controlled by an interplay  
77 between one's goals, stimuli's perceptual salience, meaning and predictability. Our study  
78 calls for a revision of attentional control theories to account for the role of contextual and  
79 multisensory control.

80

81 *Keywords:* attentional control, multisensory, real-world, semantic congruence, temporal  
82 predictability, context

83

## Introduction

84

85 Goal-directed behaviour depends on the ability to allocate processing resources towards the  
86 stimuli important to current behavioural goals (“attentional control”). On the one hand, our  
87 current knowledge about attentional control may be limited to the rigorous, yet artificial,  
88 conditions in which it is traditionally studied. On the other hand, findings from studies  
89 assessing attentional control with naturalistic stimuli (audiostories, films) may be limited by  
90 confounds from other processes present in such settings. Here, we systematically tested  
91 how traditionally studied goal- and salience-based attentional control interact with more  
92 naturalistic, context-based mechanisms.

93 In the real world, the location of goal-relevant information is rarely known in  
94 advance. Since the pioneering visual search paradigm (Treisman & Gelade, 1980), we know  
95 that in multi-stimulus settings target attributes can be used to control attention. Here,  
96 research provided conflicting results as to whether primacy in controlling attentional  
97 selection lies in task-relevance of objects’ attributes (Folk et al., 1992) or their bottom-up  
98 salience (e.g. Theeuwes, 1991). Folk et al. (1992) used a version of the spatial cueing  
99 paradigm and revealed that attentional capture is elicited only by distractors that matched  
100 the target colour. Consequently, they proposed the ‘task-set contingent attentional capture’  
101 hypothesis, i.e., salient objects will capture attention only if they share features with the  
102 target and are thus potentially task-relevant. However, subsequently mechanisms beyond  
103 goal-relevance were shown to serve as additional sources of attentional control, e.g.,  
104 spatiotemporal and semantic information within the stimulus and the environment where it  
105 appears (e.g., Chun & Jiang 1998; Peelen & Kastner, 2014; Summerfield et al., 2006; van  
106 Moorselaar & Slagter 2019; Press et al. 2020), and multisensory processes (Matusz & Eimer,  
107 2011, 2013; Matusz et al. 2015a; Lunn et al. 2019; Soto-Faraco et al. 2019).

108 Some multisensory processes occur at early latencies (<100ms post-stimulus),  
109 generated within primary cortices (e.g., Talsma & Woldroff, 2005; Raji et al. 2010; Cappe et  
110 al. 2010; reviewed in de Meo et al., 2015; Murray et al. 2016a). This enables multisensory  
111 processes to influence attentional selection in a bottom-up fashion, potentially  
112 independently of the observer’s goals. This idea was supported by Matusz and Eimer (2011)  
113 who used a multisensory adaptation of Folk et al.’s (1992) task. The authors replicated the  
114 task-set contingent attentional capture effect and showed that visual distractors captured  
115 attention more strongly when accompanied by a sound, regardless of their goal-relevance.  
116 This demonstrated the importance of bottom-up multisensory enhancement for attentional  
117 selection of visual objects. However, interactions between such goals, multisensory  
118 influences on attentional control, and the stimuli’s temporal and semantic context<sup>1</sup> remain  
119 unknown.

120

### 121 **Top-down contextual factors in attentional control**

122 The temporal structure of the environment is routinely used by the brain to build  
123 predictions. Attentional control uses such predictions to improve the selection of target  
124 stimuli (e.g., Correa et al., 2005; Coull et al., 2000; Green & McDonald, 2010; Miniussi et al.,  
125 1999; Naccache et al., 2002; Rohenkohl et al., 2014; Tivadar et al. 2021) and the inhibition of

---

<sup>1</sup> Context has been previously defined as the “immediate situation in which the brain operates... shaped by external circumstances, such as properties of sensory events, and internal factors, such as behavioural goal, motor plan, and past experiences” (van Atteveldt et al., 2014).

126 task-irrelevant stimuli (here, location- and feature-based predictions have been more  
127 researched than temporal predictions; e.g., reviewed in Noonan et al. 2018; van Moorselaar  
128 & Slagter 2020a). In naturalistic, multisensory settings, temporal predictions are known to  
129 improve language comprehension (e.g. Luo & Poeppel, 2007; ten Oever & Sack, 2015), yet  
130 their role as a source of attentional control is less known (albeit see, Zion Golumbic et al.  
131 2012, for their role in the “cocktail party” effect). Semantic relationships are another basic  
132 principle of organising information in real-world contexts. Compared to semantically  
133 incongruent or meaningless (arbitrary) multisensory stimuli, semantically congruent stimuli  
134 are more easily identified and remembered (e.g. Laurienti et al. 2004; Murray et al., 2004;  
135 Doehrmann & Naumer 2008; Chen & Spence, 2010; Matusz et al., 2015a; Tovar et al. 2020;  
136 reviewed in ten Oever et al. 2016; Murray et al., 2016b; Matusz et al. 2020) and also, more  
137 strongly attended (Matusz et al. 2015b, 2019a, 2019b; reviewed in Soto-Faraco et al., 2019;  
138 Matusz et al. 2019c). For example, Iordanenscu et al. (2009) demonstrated that search for  
139 naturalistic objects is faster when accompanied by irrelevant albeit congruent sounds.

140 What is unclear from existing research is the degree to which goal-based attentional  
141 control interacts with salience-driven (multisensory) mechanisms *and* such contextual  
142 factors. Researchers have been clarifying such interactions, but typically in a pair-wise  
143 fashion, between e.g., attention and semantic memory, or attention and predictions  
144 (reviewed in Summerfield & Eger 2009; Nobre & Gazzaley 2016; Press et al. 2020).  
145 However, in everyday situations these processes do not interact in an orthogonal, but,  
146 rather, a synergistic fashion, with multiple sources of control interacting simultaneously (ten  
147 Oever et al. 2016; Nastase et al. 2020). Additionally, in the real world, these processes  
148 operate on both unisensory and multisensory stimuli, where the latter are often more  
149 perceptually salient than the former (e.g., Santangelo & Spence 2007; Matusz & Eimer  
150 2011). Thus, one way to create more complete and “naturalistic” theories of attentional  
151 control is by investigating how one’s goals interact with *multiple* contextual factors in  
152 controlling attentional selection – and doing so in *multi-sensory* settings.

153

### 154 **The present study**

155 To shed light on how attentional control operates in naturalistic visual search settings, we  
156 investigated how visual and multisensory attentional control interact with distractor  
157 temporal predictability and multisensory semantic relationship when all are manipulated  
158 simultaneously. We likewise set out to identify brain mechanisms supporting such complex  
159 interactions. To address these questions in a rigorous and state-of-the-art fashion, we  
160 employed a ‘naturalistic laboratory’ approach that builds on several methodological  
161 advances (Matusz et al., 2019c). First, we used a paradigm that isolates a specific cognitive  
162 process, i.e., Matusz and Eimer’s (2011) multisensory adaptation of the Folk et al.’s (1992)  
163 task, where we additionally manipulated distractors’ temporal predictability and  
164 relationship between their auditory and visual features. In Folk et al.’s task, attentional  
165 control is measured via well-understood spatial cueing effects, where larger effects (e.g., for  
166 target-colour and audiovisual distractors) reflect stronger attentional capture. Notably,  
167 distractor-related responses have the added value as they isolate attentional from later,  
168 motor response-related, processes. Second, we measured a well-researched brain correlate  
169 of attentional object selection, the N2pc event-related potential (ERP) component. The  
170 N2pc is a negative-going voltage deflection starting at around 200ms post-stimulus onset at  
171 posterior electrode sites contralateral to stimulus location (Luck & Hillyard, 1994a, 1994b;  
172 Eimer, 1996; Girelli & Luck, 1997). Studies canonically analysing N2pc have provided strong

173 evidence for task-set contingency of attentional capture (e.g., Kiss et al., 2008a; 2008b;  
174 Eimer et al., 2009). Importantly, N2pc is also sensitive to meaning (e.g., Wu et al., 2015) and  
175 predictions (e.g., Burra & Kerzel, 2013), whereas its sensitivity to multisensory enhancement  
176 is limited (van der Burg et al. 2011, but see below). This joint evidence makes the N2pc a  
177 valuable ‘starting point’ for investigating interactions between visual goals and more  
178 naturalistic sources of control. Third, analysing the traditional EEG markers of attention with  
179 advanced frameworks like electrical neuroimaging (e.g., Lehmann & Skrandies 1980; Murray  
180 et al., 2008; Tivadar & Murray 2019) might offer an especially robust, accurate and  
181 informative approach.

182 Briefly, an electrical neuroimaging framework encompasses multivariate, reference-  
183 independent analyses of global features of the electric scalp field. Its main added value is  
184 that it readily distinguishes the neurophysiological mechanisms driving differences in ERPs  
185 across experimental conditions in *surface-level* EEG: 1) “gain control” mechanisms,  
186 modulating the strength of activation within an indistinguishable brain network, and 2)  
187 topographic (network-based) mechanisms, modulating the recruited brain sources (scalp  
188 EEG topography differences forcibly follow from changes in the underlying sources; Murray  
189 et al. 2008). Electrical neuroimaging overcomes interpretational limitations of canonical  
190 N2pc analyses. Most notably, a difference in mean N2pc amplitude can arise from both  
191 strength-based and **topographic** mechanisms (albeit it is assumed to signify gain control); it  
192 can also emerge from different brain source configurations (for a full discussion, see Matusz  
193 et al., 2019b).

194 We recently used this approach to better understand brain and cognitive  
195 mechanisms of attentional control. We revealed that distinct brain networks are active  
196 during ~N2pc time-window during visual goal-based *and* multisensory bottom-up attention  
197 control (across the lifespan; Turoman et al. 2021a, 2021b). However, these reflect spatially-  
198 selective, lateralised brain mechanisms, partly captured by the N2pc (via the contra- and  
199 ipsilateral comparison). There is little existing evidence to strongly predict how interactions  
200 between goals, stimulus salience and context can occur in the brain. Schröger et al. (2015)  
201 proposed that temporally unpredictable events attract attention more strongly (to serve as  
202 a signal to reconfigure the predictive model about the world), visible in larger behavioural  
203 responses and ERP amplitudes. Both predictions and semantic memory could be used to  
204 reduce attention to known (i.e., less informative) stimuli. Indeed, goal-based control uses  
205 knowledge to facilitate visual and multisensory processing (Summerfield et al. 2008;  
206 Iordanescu et al., 2008; Matusz et al. 2016; Sarmiento et al. 2016). However, several  
207 questions remain. Does knowledge affect attention to task-*irrelevant* stimuli the same way?  
208 How early do contextual factors influence stimulus processing here, if both processes are  
209 known to do so <150ms post-stimulus (Summerfield & Egnér, 2009; ten Oever et al. 2016).  
210 Finally, do contextual processes operate through lateralised or non-lateralised brain  
211 mechanisms? Below we specify our hypotheses.

212 We expected to replicate the TAC<sup>2</sup> effect: In behaviour, visible as large behavioural  
213 capture for target-colour matching distractors and no capture for nontarget-colour  
214 matching distractors (e.g., Folk et al., 1992; Folk, et al., 2002; Lien et al., 2008); in canonical  
215 EEG analyses - enhanced N2pc amplitudes for target-colour than nontarget-colour  
216 distractors (Eimer et al., 2009). TAC should be modulated by both contextual factors: the

---

<sup>2</sup> Please see Appendix 1 for the full list of abbreviations used in the manuscript.

217 predictability of distractor onset and the multisensory relationship between distractor  
218 features (semantic congruence vs. arbitrary pairing; Wu et al. 2015; Burra & Kerzel, 2013).  
219 However, as discussed above, we had no strong predictions how the contextual factors  
220 would modulate TAC (or if they interact while doing so), as these effects have never been  
221 tested systematically together, on audio-visual and task-irrelevant stimuli. For multisensory  
222 enhancement of capture, we expected to replicate it behaviourally (Matusz & Eimer 2011),  
223 but without strong predictions about concomitant N2pc modulations (c.f. van der Burg et al.  
224 2011). We expected multisensory enhancement of capture to be modulated by contextual  
225 factors, especially multisensory relationship, based on the extensive literature on the role of  
226 semantic congruence in multisensory cognition (Doehrmann & Naumer, 2008; ten Oever et  
227 al. 2016). Again, we had no strong predictions as to the directionality of these modulations  
228 or interaction of their influences.

229 We were primarily interested if interactions between visual goals (task-set  
230 contingent attentional capture, TAC), multisensory salience (multisensory enhancement of  
231 capture, MSE) and contextual processes are supported by strength-based (i.e., “gain”-like;  
232 i.e., one network is active more strongly for some and less strongly for other experimental  
233 conditions) and/or topographic (i.e., different networks are activated for different  
234 experimental conditions) brain mechanisms, as observable in *surface-level* EEG data when  
235 using multivariate analyses like electrical neuroimaging. The second aim of our study was to  
236 clarify if the attentional and contextual control interactions are supported by lateralised  
237 (N2pc-like) or nonlateralized mechanisms. To this aim, we analysed if those interactions are  
238 captured by canonical N2pc analyses or electrical neuroimaging analyses of the lateralised  
239 distractor-elicited ERPs ~180-300ms post-stimulus (N2pc-like time-window). These analyses  
240 would reveal presence of strength- and topographic *spatially-selective* brain mechanisms  
241 contributing to attentional control. However, analyses of the N2pc assume not only  
242 lateralised activity, but also symmetry; in brain anatomy but also in scalp electrodes,  
243 detecting homologous brain activity over both hemispheres. This may prevent them from  
244 detecting other, less-strongly-lateralised brain mechanisms of attentional control. We have  
245 previously found nonlateralised mechanisms to play a role in attentional control in  
246 multisensory settings (Matusz et al. 2019b). Also, semantic information and temporal  
247 expectations (and feature-based attention) are known to modulate nonlateralised ERPs  
248 (Saenz et al. 2003; Dell’Acqua et al. 2010; Dassanayake et al. 2016). Thus, as the third aim of  
249 our study, we investigated whether contextual control affects stages associated with  
250 attentional selection (reflected by the N2pc) or also earlier processing stages. We tested this  
251 by measuring strength- and/or topographic nonlateralised brain mechanisms across the  
252 whole post-stimulus time-period activity.

253

254

## 255 **Materials and Methods**

256

### 257 **Participants**

258 Thirty-nine adult volunteers participated in the study (5 left-handed, 14 males,  $M_{age}$ : 27.5  
259 years,  $SD$ : 4 years, range: 22–38 years). We conducted post-hoc power analyses for the two  
260 effects that have been previously behaviourally studied with the present paradigm, namely  
261 TAC and MSE. Based on the effect sizes in the original Matusz and Eimer (2011, Exp.2), the  
262 analyses revealed sufficient statistical power for both behavioural effects with the collected  
263 sample. For ERP analyses, we could calculate power analyses only for the TAC effect. Based

264 on a purely visual ERP study (Eimer et al., 2009) we revealed there to be sufficient statistical  
265 power to detect TAC in the N2pc in the current study (all power calculations are available in  
266 the Supplemental Online Materials, SOMs). Participants had normal or corrected-to-normal  
267 vision and normal hearing and reported no prior or current neurological or psychiatric  
268 disorders. Participants provided informed consent before the start of the testing session. All  
269 research procedures were approved by the Cantonal Commission for the Ethics of Human  
270 Research (CER-VD; no. 2018-00241).

271

## 272 **Task properties and procedures**

273 *General task procedures.* The full experimental session consisted of participants completing  
274 four experimental Tasks. All the Tasks were close adaptations of the original paradigm of  
275 Matusz and Eimer (2011 Exp.2; that is, in turn, an adaptation of the spatial-cueing task of  
276 Folk et al. [1992]). Across all the Tasks, the instructions and the overall experimental set up  
277 were the same as in the study of Matusz & Eimer (1992, Exp.2; see Figure 1A). Namely,  
278 participants searched for a target of a predefined colour (e.g., a red bar) in a 4-element  
279 array, and assessed the target's orientation (vertical vs. horizontal). Furthermore, in all  
280 Tasks, the search array was always preceded by an array containing colour distractors.  
281 Those distractors always either matched the target colour (red set of dots) or matched  
282 another, nontarget colour (blue set of dots); on 50% of all trials the colour distractors would  
283 be accompanied by a sound (audiovisual distractor condition). The distractor appeared in  
284 each of the four stimulus locations with equal probability (25%) and was thus not predictive  
285 of the location of the incoming target. Differences in response speed on trials where  
286 distractor and target appeared in the same vs. different locations were used to calculate  
287 behavioural cueing effects that were the basis of our analyses (see below). Like in the  
288 Matusz and Eimer (2011) study, across all Tasks, each trial consisted of the following  
289 sequence of arrays: base array (duration manipulated; see below), followed by distractor  
290 array (50ms duration), followed by a fixation point (150ms duration), and finally the target  
291 array (50ms duration, see Figure 1A).

292 The differences to the original study involved the changes necessary to implement  
293 the two new, contextual factors that were manipulated across the four Tasks (Figure 1B).<sup>3</sup>  
294 To implement the *Multisensory Relationship* factor, after the first two Tasks, participants  
295 completed a training session (henceforth *Training*), after which they completed the  
296 remaining two Tasks. To implement the *Distractor Onset* factor, the predictability of the  
297 onset of the distractors was manipulated, being either stable (as in the original study, Tasks  
298 2 and 4) or varying between three durations (Tasks 1 and 3). The setup involving 4  
299 consecutive Tasks separated by Training allowed a systematic comparison between the four  
300 levels of the two contextual factors. We now describe in more detail the procedures related  
301 to all Tasks, after which we provide more details on the different tasks themselves.

302 The base array contained four differently coloured sets of closely aligned dots, each  
303 dot subtending  $0.1^\circ \times 0.1^\circ$  of visual angle. The sets of dots were spread equidistally along  
304 the circumference of an imaginary circle against a black background, at an angular distance  
305 of  $2.1^\circ$  from a central fixation point. Each set could be of one of four possible colours

---

<sup>3</sup> Compared to the original paradigm, we made two additional changes, to enable the Task 1 to serve as an adult control study in a developmental study (Turoman et al., 2021). We reduced the number of elements in all arrays from 6 to 4, and targets were reshaped to look like diamonds rather than rectangles. Notably, despite these changes, we have replicated here the visual and multisensory attentional control effects.

306 (according to the RGB scale): green (0/179/0), pink (168/51/166), gold (150/134/10), silver  
307 (136/136/132). In the distractor array, one of the base array elements changed colour to  
308 either a target-matching colour, or a target-nonmatching colour that was not present in any  
309 of the elements before. The remaining three distractor array elements did not change their  
310 colour. The distractors and the subsequent target diamonds could have either a blue (RGB  
311 values: 31/118/220) or red (RGB values: 224/71/52) colour. The target array contained four  
312 bars (rectangles), where one was always the colour-defined target. The target colour was  
313 counterbalanced across participants. Target orientation (horizontal or vertical) was  
314 randomly determined on each trial. The two distractor colours were randomly selected with  
315 equal probability before each trial, and the location of the colour change distractor was not  
316 spatially predictive of the subsequent target location (distractor and target location were  
317 the same on 25% of trials). On half of all trials, distractor onset coincided with the onset of a  
318 pure sine-wave tone, presented from two loudspeakers on the left and right sides of the  
319 monitor. Sound intensity was 80 dB SPL (as in Matusz & Eimer, 2011), measured using an  
320 audiometer placed at a position adjacent to participants' ears (CESVA SC160). Through  
321 manipulations of the in-/congruence between distractor and target colour and of the  
322 presence/absence of sound during distractor presentations, there were four types of  
323 distractors, across all the Tasks: visual distractors that matched the target colour (TCCV,  
324 short for *target-colour cue visual*), visual distractors that did not match the target colour  
325 (NCCV, *nontarget-colour cue visual*), audiovisual distractors that matched the target colour  
326 (TCCAV, *target-colour cue audiovisual*), and audiovisual distractors that did not match the  
327 target colour (NCCAV, *nontarget-colour cue, audiovisual*).

328 The experimental session consisted of 4 Tasks, each spanning 8 blocks of 64 trials.  
329 This resulted in 2,048 trials in total (512 trials per Task). Participants were told to respond as  
330 quickly and accurately as possible to the targets' orientation by pressing one of two  
331 horizontally aligned round buttons (Lib Switch, Liberator Ltd.) that were fixed onto a tray  
332 bag on the participants' lap. If participants did not respond within 5000ms of the target  
333 onset, next trial was initiated; otherwise the next trial was initiated immediately after the  
334 button press. Feedback on accuracy was given after each block, followed by a progress  
335 screen (*a treasure map*), which informed participants of the number of remaining blocks  
336 and during which participants could take a break. Breaks were also taken between each  
337 Task, and before and after the Training. As a pilot study revealed sufficient proficiency at  
338 conducting the tasks after a few trials (over 50% accuracy), participants did not practice  
339 doing the Tasks before administration unless they had trouble following the task  
340 instructions. The experimental session took place in a dimly lit, sound-attenuated room,  
341 with participants seated at 90cm from a 23" LCD monitor with a resolution of 1080 × 1024  
342 (60-Hz refresh rate, HP EliteDisplay E232). All visual elements were approximately  
343 equiluminant ( $\sim 20\text{cd/m}^2$ ), as determined by a luxmeter placed at a position close to the  
344 screen, measuring the luminance of the screen filled with each respective element's colour.  
345 The averages of three measurement values per colour were averaged across colours and  
346 transformed from lux to  $\text{cd/m}^2$  to facilitate comparison with the results of Matusz & Eimer  
347 (2011). The experimental session lasted <3h in total, including an initial explanation and  
348 obtaining consent, EEG setup, administration of Tasks and Training, and breaks.

349 We now describe the details of the Tasks and Training, which occurred always in the  
350 same general order: Tasks 1 and 2, followed by the Training, followed by Tasks 3 and 4 (the  
351 order of Tasks 1 and 2 and, separately, the order of Tasks 3 and 4, was counterbalanced  
352 across participants). Differences across the four Tasks served to manipulate the two



353 contextual factors (illustrated in Figure 1B). The factor *Multisensory Relationship*  
354 represented the relation between the visual (the colour of the distractor) and the auditory  
355 (the accompanying sound) component stimuli that made up the distractors. These two  
356 stimuli could be related just by their simultaneous presentation (Arbitrary condition) or by  
357 additionally sharing meaning (Congruent condition). The factor *Distractor Onset*  
358 represented the temporal predictability of the distractors, i.e., whether their onset was  
359 constant within Tasks and, therefore Predictable condition, or variable and, therefore,  
360 Unpredictable condition. The manipulation of the two context factors led to the creation of  
361 four contexts, represented by each of the Tasks 1 – 4 (i.e., Arbitrary Unpredictable, Arbitrary  
362 Predictable, Congruent Unpredictable, and Congruent Predictable). To summarise, the two  
363 within-task factors encompassing distractor colour and tone presence/absence, together  
364 with the two between-task factors resulted in a total of four factors in our analysis design:  
365 Distractor Colour (TCC vs. NCC), Distractor Modality (V vs. AV), Distractor Onset (Predictable  
366 vs. Unpredictable) and Multisensory Relationship (Arbitrary vs. Congruent)<sup>4</sup>.

367

368 **Tasks 1 and 2.** As mentioned above, across Tasks 1 and 2, the colour of the distractor  
369 and the sound accompanying the colour distractor were related only by their simultaneous  
370 presentation. As such, trials from Tasks 1 and 2 made up the Arbitrary condition of the  
371 Multisensory Relationship factor. Sound frequency was always 2000Hz (as in Matusz &  
372 Eimer, 2011). The main difference between Task 1 and Task 2 lied in the onset of the  
373 distractors in those tasks. Unbeknownst to participants, in Task 1, duration of the base array  
374 varied randomly on a trial-by-trial basis, between 100ms, 250ms and 450ms, i.e., the  
375 distractor onset was unpredictable. In contrast, in Task 2, the base array duration was  
376 always constant, at 450ms, i.e., the distractor onset was predictable. With this  
377 manipulation, considering the between-task factors: Task 1 represented Arbitrary  
378 (Multisensory Relationship) and Unpredictable (Distractor Onset) trials, and Task 2 -  
379 Arbitrary (Multisensory Relationship) and Predictable (Distractor Onset) trials.

380 **Training.** The Training served to induce in participants a semantic-level association  
381 between a specific distractor colour and a specific pitch. This rendered distractors in the  
382 Tasks following the Training semantically related (Congruent), and distractors in the  
383 preceding Tasks semantically unrelated (Arbitrary). The Training consisted of an Association  
384 phase followed by a Testing phase (both based on the association task in Sui, He &  
385 Humphreys, 2012; see also Sun et al., 2016).

386 *1. Association phase.* The Association phase served to induce the AV associations in  
387 participants. Participants were shown alternating colour word–pitch pairs, presented in the  
388 centre of the screen (the tone was presented from two lateral speakers, rendering it  
389 spatially diffuse and so appearing to also come from the centre of the screen). The words  
390 denoted one of two distractor colours (*red* or *blue*). The tone of either high (4000Hz) or low  
391 (300Hz) pitch. Both the colour word and sound were presented for 2 seconds, after which a  
392 central fixation cross was presented for 150ms, followed by the next colour word–pitch pair.  
393 There could be two possible colour–pitch pairing options. In one, the high-pitch tone was

---

<sup>4</sup> As part of our stimulus design and like Matusz and Eimer (2011), we manipulated a third within-task factor, i.e., whether the distractor and the upcoming target appeared in the same compared to a different location. This manipulation was necessary for us to compute behavioural attentional capture that were the bases of our complex 4-factor analyses. However, to avoid confusing the reader, we have removed the descriptions of this factor from the main text and we only refer briefly to the manipulation in the *General task procedures*.

394 associated with the word *red*, the low-pitch tone - with the word *blue*. In the second option,  
395 the high-pitch tone was associated with the word *blue*, the low-pitch tone with the word *red*  
396 (see Figure 1C, Association phase). Pairing options were counterbalanced across  
397 participants. Thus, for participants trained with the first option, the pairing of word *red* and  
398 a high-pitch tone would be followed by the pairing of the word *blue* with a low-pitch tone,  
399 again followed by the *red*-high pitch pairing, etc. There were 10 presentations per pair,  
400 resulting in a total of 20 trials. Colour words were chosen instead of actual colours to ensure  
401 that the AV associations were based on meaning rather than lower-level stimulus features  
402 (for examples of such taught crossmodal correspondences see, e.g., Ernst, 2007). Also,  
403 colour words were shown in participants' native language (speakers: 19 French, 8 Italian, 5  
404 German, 4 Spanish, 3 English). Participants were instructed to try to memorise the pairings  
405 as best as they could, being informed that they would be subsequently tested on how well  
406 they learnt the pairings.

407  
408  
409  
410  
411

\*\* FIGURE 1 HERE \*\*

412 *II. Testing phase.* The Testing phase served to ensure that the induced colour-pitch  
413 associations was strong. Now, participants were shown colour word-pitch pairings (as in the  
414 Association phase) but also colour-pitch pairings (a string of x's in either red or blue, paired  
415 with a sound, Figure 1C, *Testing phase* panel). Additionally, now, the pairings either  
416 matched or mismatched the type of associations induced in the Association phase, e.g., if  
417 the word *red* have been paired with a high-pitch tone in the Testing phase, the matching  
418 pair now would be a word *red* or red x's, paired with a high-pitch tone, and mismatching  
419 pair - the word *red* or red x's paired with a low-pitch tone. Participants had to indicate if a  
420 given pair was matched or mismatched by pressing one of two buttons (same button setup  
421 as in the Tasks). Participants whose accuracy was  $\leq 50\%$  had to repeat the testing.

422 The paradigm that Sui et al. (2012) have designed led to people being able to  
423 reliably associate low-level visual features (colours, geometric shapes) with abstract social  
424 concepts (themselves, their friend, a stranger). Following their design, in the Testing phase,  
425 each pairing was shown for 250ms, of which 50ms was the sound (instead of the stimulus  
426 duration of 100ms that Sui et al. used, to fit our stimulus parameters). The pairing  
427 presentation was followed by a blank screen (800ms), during which participants had to  
428 respond, and after each responses a screen with feedback on their performance appeared.  
429 Before each trial, a fixation cross was also shown, for 500ms. Each participant performed  
430 three blocks of 80 trials, with 60 trials per possible combination (colour word - sound  
431 matching, colour word - sound mismatching, colour - sound matching, colour - sound  
432 mismatching). A final summary of correct, incorrect, and missed trials was shown at the end  
433 of Testing phase.

434 **Tasks 3 and 4.** Following the Training, in Tasks 3 and 4, the distractors' colour and  
435 the accompanying sound were now semantically related. Thus, the trials from these two  
436 Tasks made up the (semantically) Congruent condition of the Multisensory Relationship  
437 factor. Only congruent colour-pitch distractor pairings were now presented, as per the  
438 pairing option induced in the participants. That is, if the colour red was paired with a high-  
439 pitch tone in the Association phase, red AV distractors in Tasks 3 and 4 were always  
440 accompanied by a high-pitch tone. The pitch of sounds was now either 300Hz (low-pitch

441 condition; chosen based on Matusz & Eimer, 2013, where two distinct sounds were used) or  
442 4000Hz (high-pitch condition; chosen for its comparable perceived loudness in relation to  
443 the above two sound frequencies, as per the revised ISO 226:2003 equal-loudness-level  
444 contours standard; Spierer et al. 2013). As between Tasks 1 and 2, Task 3 and Task 4 differed  
445 in the predictability of distractor onsets, i.e., in Task 3, distractor onset was unpredictable,  
446 and in Task 4 - predictable. Therefore, Task 3 represented Congruent (Multisensory  
447 Relationship) and Unpredictable (Distractor Onset) trials, and Task 4 - Congruent  
448 (Multisensory Relationship) and Predictable (Distractor Onset) trials.

449

#### 450 **EEG acquisition and preprocessing**

451 Continuous EEG data sampled at 1000Hz was recorded using a 129-channel HydroCel  
452 Geodesic Sensor Net connected to a NetStation amplifier (Net Amps 400; Electrical  
453 Geodesics Inc., Eugene, OR, USA). Electrode impedances were kept below 50k $\Omega$ , and  
454 electrodes were referenced online to Cz. First, offline filtering involved a 0.1Hz high-pass  
455 and 40Hz low-pass as well as 50Hz notch (all filters were second-order Butterworth filters  
456 with  $-12\text{dB/octave}$  roll-off, computed linearly with forward and backward passes to  
457 eliminate phase-shift). Next, the EEG was segmented into peri-stimulus epochs from 100ms  
458 before distractor onset to 500ms after distractor onset. An automatic artefact rejection  
459 criterion of  $\pm 100\mu\text{V}$  was used, along with visual inspection. Epochs were then screened for  
460 transient noise, eye movements, and muscle artefacts using a semi-automated artefact  
461 rejection procedure. Data from artefact contaminated electrodes were interpolated using  
462 three-dimensional splines (Perrin et al., 1987). Across all Task, 11% of epochs were removed  
463 on average and 8 electrodes were interpolated per participant (6% of the total electrode  
464 montage).

465 Cleaned epochs were averaged, baseline corrected to the 100ms pre-distractor time  
466 interval, and re-referenced to the average reference. Next, to eliminate residual  
467 environmental noise in the data, a 50Hz filter was applied<sup>5</sup>. All the above steps were done  
468 separately for ERPs from the four distractor conditions, and separately for distractors in the  
469 left and right hemifield. We next relabeled ERPs from certain conditions, as is done in  
470 traditional lateralised ERP analyses (like those of the N2pc). Namely, we relabelled single-  
471 trial data from all conditions where distractors appeared on the *left* so that the electrodes  
472 over the left hemiscalp now represented the activity over the right hemiscalp, and  
473 electrodes over the right hemiscalp – represented activity over the left hemiscalp, thus  
474 creating “mirror distractor-on-the-right” single-trial data. Next, these mirrored data and the  
475 veridical “distractor-on-the-right” data from each of the 4 distractor conditions were  
476 averaged together, creating a single average ERP for each of the 4 distractor conditions. The  
477 contralaterality factor (i.e. contralateral vs. ipsilateral potentials) is normally represented by  
478 separate ERPs (one for contralateral activity, and one for ipsilateral activity; logically more  
479 pairs for pair-wise N2pc analyses). In our procedure, the lateralised voltage gradients across  
480 the whole scalp are preserved within each averaged ERP by simultaneous inclusion of both  
481 contralateral and ipsilateral hemiscalp activation. Such a procedure enabled us to fully  
482 utilise the capability of the electrical neuroimaging analyses in revealing both lateralised and  
483 non-lateralised mechanisms that support the interactions of attentional control with

---

<sup>5</sup> While filtering following epoch creation is normally discouraged (e.g., Widmann et al. 2015), control analyses we have carried out demonstrated that our filtering procedure was necessary and did not harm the data quality within our time-window of interest (for results of control analyses, see SOMs: Justification of filtering choices).

484 context control. As a result of the relabelling, we obtained 4 different ERPs: TCCV (target  
485 colour-cue, Visual), NCCV (nontarget colour-cue, Visual), TCCAV (target colour-cue,  
486 AudioVisual), NCCAV (nontarget colour-cue, AudioVisual). Preprocessing and EEG analyses,  
487 unless otherwise stated, were conducted using CarTool software (available for free at  
488 [www.fbmlab.com/cartool-software/](http://www.fbmlab.com/cartool-software/); Brunet, Murray, & Michel, 2011).

489

#### 490 **Data analysis design**

491 **Behavioural analyses.** Like in Matusz and Eimer (2011), and because mean reaction  
492 times (RTs) and accuracy did not differ significantly between the four Tasks, the basis of our  
493 analyses was RT spatial cueing effects (henceforth “behavioural capture effects”). These  
494 were calculated by subtracting the mean RTs for trials where the distractor and target were  
495 in the same location from the mean RTs for trials where the distractor and the target  
496 location differed, separately for each of the four distractor conditions. Such spatial cueing  
497 data were analysed using the repeated-measures analysis of variance (rmANOVA). Error  
498 rates (%) were also analysed. As they were not normally distributed, we analysed error rates  
499 using the Kruskal–Wallis  $H$  test and the Durbin test. The former was used to analyse if error  
500 rates differed significantly between Tasks, while the latter was used to analyse differences  
501 between experimental conditions within each Task separately.

502 Following Matusz and Eimer (2011), RT data were cleaned by discarding incorrect  
503 and missed trials, as well as RTs below 200ms and above 1000ms. Additionally, to enable  
504 more direct comparisons with the developmental study for which current Task 1 served as  
505 an adult control (Turoman et al., 2021a, 2021b), we have further removed trials with RTs  
506 outside 2.5SD of the individual mean RT. As a result, a total of 5% of trials across all Tasks  
507 were removed. Next, behavioural capture effects were submitted to a four-way  $2 \times 2 \times 2 \times 2$   
508 rmANOVA with factors: Distractor Colour (TCC vs. NCC), Distractor Modality (V vs. AV),  
509 Multisensory Relationship (Multisensory Relationship; Arbitrary vs. Congruent), and  
510 Distractor Onset (Distractor Onset; Unpredictable vs. Predictable). Due to the error data not  
511 fulfilling criteria for normality, we used Distractor-Target location as a factor in the analysis,  
512 conducting 3-way Durbin tests for each Task, with factors Distractor Colour, Distractor  
513 Modality, and Distractor-Target Location. All analyses, including post-hoc paired  $t$ -tests,  
514 were conducted using SPSS for Macintosh 26.0 (Armonk, New York: IBM Corporation). For  
515 brevity, we only present the RT results in the Results, and the error rate results can be found  
516 in SOMs.

517 **ERP analyses.** The preprocessing of the ERPs triggered by the visual and audiovisual  
518 distractors across the 4 different experimental blocks created ERP averages in which the  
519 contralateral versus ipsilateral ERP voltage gradients across the whole scalp were preserved.  
520 We first conducted a canonical N2pc analysis, as the N2pc is a well-studied and well-  
521 understood correlate of attentional selection in visual settings. However, it is unclear if the  
522 N2pc also indexes bottom-up attentional selection modulations by multisensory stimuli, or  
523 top-down modulations by contextual factors like multisensory semantic relationships (for  
524 visual-only study, see e.g., Wu et al. 2015) or stimulus onset predictability (for visual-only  
525 study, see e.g., Burra & Kerzel, 2013). N2pc analyses served also to bridge electrical  
526 neuroimaging analyses with the existing literature and EEG approaches more commonly  
527 used to investigate attentional control. Briefly, electrical neuroimaging encompasses a set of  
528 multivariate, reference-independent analyses of global features of the electric field  
529 measured at the scalp (König et al., 2014; Michel & Murray, 2012; Murray, Brunet, & Michel,  
530 2008; Lehmann & Skrandies, 1980; Tivadar & Murray, 2019; Tzovara et al., 2012) that can

531 detect spatiotemporal patterns in EEG across different contexts and populations (e.g., Neel  
532 et al. 2019; Matusz et al. 2018). The key advantages of electrical neuroimaging analyses over  
533 canonical N2pc analyses and how the former can complement the latter when combined,  
534 are described in the Introduction.

535 *Canonical N2pc analysis.* To analyse lateralised mechanisms using the traditional  
536 N2pc approach, we extracted mean amplitude values from, first, two electrode clusters  
537 comprising PO7/8 electrode equivalents (e65/90; most frequent electrode pair used to  
538 analyse the N2pc), and, second, their six immediate surrounding neighbours (e58/e96,  
539 e59/e91, e64/e95, e66/e84, e69/e89, e70/e83), over the 180–300ms post-distractor time-  
540 window (based on time-windows commonly used in traditional N2pc studies, e.g., Luck &  
541 Hillyard, 1994b; Eimer, 1996; including distractor-locked N2pc, Eimer & Kiss 2008; Eimer et  
542 al. 2009). Analyses were conducted on the mean amplitude of the N2pc difference  
543 waveforms, which were obtained by subtracting the average of amplitudes in the ipsilateral  
544 posterior-occipital cluster from the average of amplitudes in the contralateral posterior-  
545 occipital cluster. This step helped mitigate the loss of statistical power that could result from  
546 the addition of contextual factors into the design. N2pc means were thus submitted to a 4-  
547 way  $2 \times 2 \times 2 \times 2$  rmANOVA with factors Distractor Colour (TCC vs. NCC), Distractor Modality  
548 (V vs. AV), Multisensory Relationship (Arbitrary vs. Congruent), and Distractor Onset  
549 (Unpredictable vs. Predictable), analogously to the behavioural analysis. Notably, the N2pc  
550 is not sensitive to the location of the stimulus of interest *per se*, but rather to the side of its  
551 presentation. As such, in canonical analyses of distractor-elicited N2pc, the congruence  
552 between distractor and target, unlike in behavioural analyses, is not considered (e.g., Lien et  
553 al. 2008; Eimer & Kiss 2008; Eimer et al. 2009). Consequently, in our N2pc analyses, target-  
554 location congruent and incongruent distractor ERPs were averaged, as a function of the side  
555 of distractor presentation.

556 *Electrical Neuroimaging of the N2pc component.* Our electrical neuroimaging  
557 analyses separately tested response strength and topography in N2pc-like lateralised ERPs  
558 (see e.g. Matusz et al., 2019b for a detailed, tutorial-like description of how electrical  
559 neuroimaging measures can aid the study of attentional control processes). We assessed if  
560 interactions between visual goals, multisensory salience and contextual factors 1)  
561 modulated the distractor-elicited lateralised ERPs, and 2) if they do so by altering the  
562 strength of responses within statistically indistinguishable brain networks and/or altering  
563 the recruited brain networks.

564 *1. Lateralised analyses.* To test for the involvement of strength-based spatially-  
565 selective mechanisms, we analysed Global Field Power (GFP) in lateralised ERPs. GFP is the  
566 root mean square of potential [ $\mu$ V] across the entire electrode montage (see Lehmann &  
567 Skrandies, 1980). To test for the involvement of network-related spatially-selective  
568 mechanisms, we analysed stable patterns in ERP topography characterising different  
569 experimental conditions using a clustering approach known as the Topographic Atomize and  
570 Agglomerate Hierarchical Clustering (TAAHC). This topographic clustering procedure  
571 generated sets of clusters of topographical maps that explained certain amounts of variance  
572 within the group-averaged ERP data. Each cluster was labelled with a ‘template map’ that  
573 represented the centroid of its cluster. The optimal number of clusters is one that explains  
574 the largest global explained variance in the group-averaged ERP data with the smallest  
575 number of template maps, and which we identified using the modified Krzanowski–Lai  
576 criterion (Murray et al., 2008). In the next step, i.e., the so-called fitting procedure, the  
577 single-subject data was ‘fitted’ back onto the topographic clustering results, such that each

578 datapoint of each subject's ERP data over a chosen time-window was labelled by the  
579 template map with which it was best spatially correlated. This procedure resulted in a  
580 number of timeframes that a given template map was present over a given time-window,  
581 which durations (in milliseconds) we then submitted to statistical analyses described below.

582 In the present study, we conducted strength- and topographic analyses using the  
583 same 4-way repeated-measures design as in the behavioural and canonical N2pc analyses,  
584 on the lateralised whole-montage ERP data. Since the N2pc is a lateralised ERP, we first  
585 conducted an electrical neuroimaging analysis of lateralised ERPs in order to uncover the  
586 modulations of the N2pc by contextual factors. To obtain *global* electrical neuroimaging  
587 measures of *lateralised* N2pc effects, we computed a difference ERP by subtracting the  
588 voltages over the contralateral and ipsilateral hemiscalp, separately for each of the 4  
589 distractor conditions. This resulted in a 59-channel difference ERP (as the midline electrodes  
590 from the 129-electrode montage were not informative). Next, this difference ERP was  
591 mirrored onto the other side of the scalp, recreating a "fake" 129 montage (with values on  
592 midline electrodes now set to 0). It was on these mirrored "fake" 129-channel lateralised  
593 difference ERPs that lateralised strength-based and topography-based electrical  
594 neuroimaging analyses were performed. Here, GFP was extracted over the canonical 180–  
595 300ms N2pc time-window and submitted to a  $2 \times 2 \times 2 \times 2$  rmANOVA with factors Distractor  
596 Colour (TCC vs. NCC), Distractor Modality (V vs. AV), as well as the two new factors,  
597 Multisensory Relationship (Arbitrary vs. Congruent), and Distractor Onset (Distractor Onset;  
598 Unpredictable vs. Predictable). Meanwhile, for topographic analyses, the "fake" 129-  
599 channel data across the 4 Tasks were submitted to a topographic clustering over the entire  
600 post-distractor period. Next, the data were fitted back over the 180-300ms period. Finally,  
601 the resulting number of timeframes (in ms) was submitted to the same rmANOVA as the  
602 GFP data above.

603 It remains unknown if the tested contextual factors modulate lateralised ERP  
604 mechanisms at all. Given evidence that semantic information and temporal expectations  
605 can modulate *nonlateralised* ERPs within the first 100–150ms post-stimulus (e.g., Dell'Acqua  
606 et al., 2010; Dassanayake et al., 2016), we also investigated the influence of contextual  
607 factors on nonlateralised voltage gradients, in an exploratory fashion. It must be noted that  
608 ERPs are sensitive to the inherent physical differences in visual and audiovisual conditions.  
609 Specifically, on audiovisual trials, the distractor-induced ERPs would be contaminated by  
610 brain response modulations induced by sound processing, with these modulations visible in  
611 our data already at 40ms post-distractor. Consequently, any direct comparison of visual-  
612 only and audiovisual ERPs would index auditory processing per se and not capture of  
613 attention by audiovisual stimuli. Such confounded sound-related activity is eliminated in the  
614 canonical N2pc analyses through the contralateral-minus-ipsilateral subtraction. To  
615 eliminate this confound in our electrical neuroimaging analyses here, we calculated  
616 difference ERPs, first between TCCV and NCCV conditions, and then between TCCAV and  
617 NCCAV conditions. Such difference ERPs, just as the canonical N2pc difference waveform,  
618 subtract out the sound processing confound in visually-induced ERPs. As a result of those  
619 difference ERPs, we removed factors Distractor Colour and Distractor Modality, and  
620 produced a new factor, Target Difference (two levels:  $D_{AV}$  [TCCAV – NCCAV difference] and  
621  $D_V$  [TCCV – NCCV difference]), that indexed the enhancement of visual attentional control by  
622 sound presence.

623 *II. Nonlateralised analyses.* All nonlateralised electrical neuroimaging analyses  
624 involving context factors were based on the Target Difference ERPs. Strength-based

625 analyses, voltage and GFP data were submitted to 3-way rmANOVAs with factors:  
626 Multisensory Relationship (Arbitrary vs. Congruent), Distractor Onset (Unpredictable vs.  
627 Predictable), and Target Difference ( $D_{AV}$  vs.  $D_V$ ), and analysed using the STEN toolbox 1.0  
628 (available for free at <https://zenodo.org/record/1167723#.XS3lsi17E6h>). Follow-up tests  
629 involved further ANOVAs and pairwise  $t$ -tests. To correct for temporal and spatial  
630 correlation (see Guthrie & Buchwald, 1991), we applied a temporal criterion of >15  
631 contiguous timeframes, and a spatial criterion of >10% of the 129- channel electrode  
632 montage at a given latency for the detection of statistically significant effects at an alpha  
633 level of 0.05. As part of topography-based analyses, we segmented the ERP difference data  
634 across the post-distractor and pre-target onset period (0 – 300ms from distractor onset). To  
635 isolate the effects related to each of the two cognitive processes and reduce the complexity  
636 of the performed analyses, we carried out two topographic clustering analyses. Topographic  
637 clustering on nonlinear mechanisms contributing to TAC was based on the visual Target  
638 Difference ERPs, while the clustering isolating MSE was based on difference ERPs resulting  
639 from the subtraction of  $D_{AV}$  and  $D_V$ . Thus, 4 group-averaged ERPs were submitted to both  
640 clustering analyses, one for each of the context-related conditions. Next, the data were  
641 fitted onto the canonical N2pc time-window (180–300ms) as well as other, earlier time-  
642 periods, notably, also ones including time-periods highlighted by the GFP results as  
643 representing significant condition differences. The resulting map presence (in ms) over the  
644 given time-windows were submitted to 4-way rmANOVAs with factors: Multisensory  
645 Relationship (Arbitrary vs. Congruent), Distractor Onset (Unpredictable vs. Predictable), and  
646 Map (different numbers of maps, depending on the topographic clustering analyses and  
647 time-windows within each clustering analyses), followed by post-hoc  $t$ -tests. Maps with  
648 durations <15 contiguous timeframes were not included in the analyses. Unless otherwise  
649 stated in the Results, map durations were statistically different from 0ms (as confirmed by  
650 post-hoc one-sample  $t$ -tests), meaning that they were reliably present across the time-  
651 windows of interest. Holm-Bonferroni corrections (Holm, 1979) were used to correct for  
652 multiple comparisons between map durations. Comparisons passed the correction unless  
653 otherwise stated.

654

655

## Results

656

### Behavioural analyses

#### *Interaction of TAC and MSE with contextual factors*

659 To shed light on attentional control in naturalistic settings, we first tested whether  
660 top-down visual control indexed by TAC interacted with contextual factors in behavioural  
661 measures. First, our  $2 \times 2 \times 2 \times 2$  rmANOVA confirmed the presence of TAC, via a main effect  
662 of Distractor Colour,  $F_{(1, 38)} = 340.4$ ,  $p < 0.001$ ,  $\eta_p^2 = 0.9$ , with TCC distractors (42ms), but not  
663 NCC distractors (-1ms), eliciting reliable behavioural capture effects. Of central interest  
664 here, the strength of TAC was dependent on whether the multisensory relationship within  
665 the distractor involved mere simultaneity or semantic congruence. This was demonstrated  
666 by a 2-way Distractor Colour  $\times$  Multisensory Relationship interaction,  $F_{(1, 38)} = 4.5$ ,  $p = 0.041$ ,  
667  $\eta_p^2 = 0.1$  (Figure 2). This effect was driven by behavioural capture effects elicited by TCC  
668 distractors being reliably larger for the Arbitrary (45ms) than for the Congruent (40ms)  
669 condition,  $t_{(38)} = 1.9$ ,  $p = 0.027$ . NCC distractors showed no evidence of Multisensory  
670 Relationship modulation (Arbitrary vs. Congruent,  $t_{(38)} = 1$ ,  $p = 0.43$ ). Contrastingly, TAC  
671 showed no evidence of modulation by predictability of the distractor onset (no 2-way

672 Distractor Colour × Distractor Onset interaction,  $F_{(1, 38)} = 2$ ,  $p = 0.16$ ). Thus, visual feature-  
673 based attentional control interacted with the contextual factor of distractor semantic  
674 congruence, but not distractor temporal predictability.

675 Next, we investigated potential interactions of multisensory enhancements with  
676 contextual factors. Expectedly, there was behavioural MSE (a significant main effect of  
677 Distractor Modality,  $F_{(1, 38)}=13.5$ ,  $p=0.001$ ,  $\eta_p^2=0.3$ ), where visually-elicited behavioural  
678 capture effects (18ms) were enhanced on AV trials (23ms). Unlike TAC, this MSE effect  
679 showed no evidence of interaction with either of the two contextual factors (Distractor  
680 Modality × Multisensory Relationship interaction,  $F<1$ ; Distractor Modality × Distractor  
681 Onset interaction: *n.s.* trend,  $F_{(1, 38)}=3.6$ ,  $p=0.07$ ,  $\eta_p^2= 0.1$ ). Thus, behaviourally, Multisensory  
682 enhancement of attentional capture was not modulated by distractors' semantic  
683 relationship nor its temporal predictability. We have also observed other, unexpected  
684 effects, but as these were outside of the focus of the current paper, which aims to elucidate  
685 the interactions between visual (goal-based) and multisensory (salience-driven) attentional  
686 control and contextual mechanisms, we describe them only in SOMs.

687

688

\*\* FIGURE 2 HERE \*\*

690

691

692

### 693 **ERP analyses**

#### 694 ***Lateralised (N2pc-like) brain mechanisms***

695 We next investigated the type of brain mechanisms that underlie interactions between  
696 more traditional attentional control (TAC, MSE) and contextual control over attentional  
697 selection. Our analyses on the lateralised responses, spanning both a canonical and EN  
698 framework, revealed little evidence for a role of spatially-selective mechanisms in  
699 supporting the above interactions. Both canonical N2pc and electrical neuroimaging  
700 analyses confirmed the presence of TAC (see Fig. 3 for N2pc waveforms across the four  
701 distractor types). However, TAC did not interact with either of the two contextual factors.  
702 Lateralised ERPs also showed no evidence for sensitivity to MSE nor for interactions  
703 between MSE and any contextual factors. Not even the main effects of Multisensory  
704 Relationship and Distractor Onset<sup>6</sup> were present in lateralised responses (See SOMs for full  
705 description of the results of lateralised ERP analyses).

706

707

\*\* FIGURE 3 HERE \*\*

708

709

710

#### 711 ***Nonlateralised brain mechanisms***

712 A major part of our analyses focused on understanding the role of nonlateralised ERP  
713 mechanisms in the interactions between visual goals (TAC), multisensory salience (MSE) and  
714 contextual control. To remind the reader, to prevent nonlateralised ERPs from being

---

<sup>6</sup> Any ERP results related to Distractor Onset are unlikely to be confounded by shifted baseline due to potential dominance of one ISI type (100ms, 250ms, 450ms) over others, as no such dominance was identified in a subsample of data.



715 confounded by the presence of sound on AV trials, we based our analyses here on the  
716 difference ERPs indexing visual attentional control under sound absence vs. presence. That  
717 is, we calculated ERPs of the difference between TCCV and NCCV conditions, and between  
718 TCCAV and NCCAV conditions ( $D_V$  and  $D_{AV}$  levels, respectively, of the Target Difference  
719 factor). We focus the description of these results on the effects of interest (see SOMs for full  
720 description of results).

721 The  $2 \times 2 \times 2$  (Multisensory Relationship  $\times$  Distractor Onset  $\times$  Target Difference)  
722 rmANOVA on electrode-wise voltage analyses revealed a main effect of Target Difference at  
723 53–99ms and 141–179ms, thus both at early, perception-related, and later, attentional  
724 selection-related latencies (reflected by the N2pc). Across both time-windows, amplitudes  
725 were larger for  $D_{AV}$  (TCCAV – NCCAV difference) than for  $D_V$  (TCCV – NCCV difference). This  
726 effect was further modulated, evidenced by a 2-way Target Difference  $\times$  Multisensory  
727 Relationship interaction, at the following time-windows: 65–103ms, 143–171ms, and 194–  
728 221ms (all  $p$ 's  $< 0.05$ ). The interaction was driven by Congruent distractors showing larger  
729 amplitudes for  $D_{AV}$  than  $D_V$  within all 3 time-windows (65–97ms, 143–171ms, and 194–  
730 221ms; all  $p$ 's  $< 0.05$ ). No similar differences were found for Arbitrary distractors, and there  
731 were no other interactions that passed the temporal and spatial criteria for multiple  
732 comparisons of  $>15$  contiguous timeframes and  $>10\%$  of the 129- channel electrode  
733 montage.

734

735 ***Interaction of TAC with contextual factors.*** We next used electrical neuroimaging analyses  
736 to investigate the contribution of the strength- and topography-based nonlateralised  
737 mechanisms to the interactions between TAC and contextual factors.

738 ***Strength-based brain mechanisms.*** A  $2 \times 2 \times 2$  Target Difference  $\times$  Multisensory  
739 Relationship  $\times$  Distractor Onset rmANOVA on the GFP mirrored the results of the electrode-  
740 wise analysis on ERP voltages by showing a main effect of Target Difference spanning a large  
741 part of the first 300ms post-distractor both before and in N2pc-like time-windows (19–  
742 213ms, 221–255ms, and 275–290ms). Like in the voltage waveform analysis, the GFP was  
743 larger for  $D_{AV}$  than  $D_V$  (all  $p$ 's  $< 0.05$ ). In GFP, Target Difference interacted both with  
744 Multisensory Relationship (23–255ms) and separately with Distractor Onset (88–127ms; see  
745 SOMs for full description). Notably, there was a 3-way Target Difference  $\times$  Multisensory  
746 Relationship  $\times$  Distractor Onset interaction, spanning 102–124ms and 234–249ms. We  
747 followed up this interaction with a series of post-hoc tests to gauge the modulations of TAC  
748 (and MSE, see below) by the two contextual factors.

749 In GFP, Multisensory Relationship and Distractor Onset interacted independently of  
750 Target Difference in the second time-window, which results we describe in SOMs. To gauge  
751 differences in the strength of TAC in GFP across the 4 contexts (i.e., Arbitrary Unpredictable,  
752 Arbitrary Predictable, Congruent Unpredictable, and Congruent Predictable), we focused  
753 the comparisons on only visually-elicited target differences (to minimise any potential  
754 confounding influences from sound processing) across the respective levels of the 2  
755 contextual factors. The weakest GFPs were observed for Arbitrary Predictable distractors  
756 (Figure 4A). They were weaker than GFPs elicited for Arbitrary Unpredictable distractors  
757 (102–124ms and 234–249ms), and Predictable Congruent distractors (only in the later  
758 window, 234–249ms).

759 ***Topography-based brain mechanisms.*** We focused the topographic clustering of the  
760 TAC-related topographic activity on the whole 0–300ms post-distractor time-window  
761 (before the target onset), which revealed 10 clusters that explained 82% of the global

762 explained variance within the visual-only ERPs. This time-window of 29–126ms post-  
763 distractor was selected on based on the GFP peaks, which are known to correlate with  
764 topographic stability (Lehmann 1987; Brunet et al. 2011), and in some conditions, based on  
765 the fact that specific template was dominated responses in group-averaged data from given  
766 conditions, e.g., Arbitrary Unpredictable and Congruent Unpredictable conditions, but not  
767 for other conditions. This was confirmed by our statistical analyses, with a  $2 \times 2 \times 5$   
768 rmANOVA over the 29–126ms post-distractor time-window, which revealed a 3-way  
769 Multisensory Relationship  $\times$  Distractor Onset  $\times$  Map interaction,  $F_{(3,2,122)} = 5.3$ ,  $p = 0.002$ ,  $\eta_p^2$   
770  $= 0.1$ .

771 Follow-up tests in the 29–126ms time-window focused on maps differentiating  
772 between the 4 contexts as a function of the two contextual factors (results of follow-up  
773 analyses as a function of Multisensory Relationship and Distractor Onset are visible in Figure  
774 4B in leftward panel and rightward panel, respectively). These results confirmed that  
775 context altered the processing of distractors from early on. The results also confirmed the  
776 clustering that the context did so by engaging different networks for most of the different  
777 combinations of Multisensory Relationship and Distractor Onset: Arbitrary Unpredictable -  
778 Map A2, Congruent Unpredictable - Map A5, as well as for Arbitrary Predictable - Map A1  
779 (no map predominantly involved in the responses for Congruent Predictable).

780 *Arbitrary Predictable distractors*, which elicited the weakest GFP, recruited  
781 predominantly Map A1 (37ms) during processing. This map was more involved in the  
782 processing of those distractors vs. Congruent Predictable distractors (21ms),  $t_{(38)} = 2.7$ ,  $p =$   
783  $0.013$  (Fig.4B bottom panel).

784 *Arbitrary Unpredictable* distractors largely recruited Map A2 (35ms) during  
785 processing. This map was more involved in the processing of these distractors vs. Arbitrary  
786 Predictable distractors (18ms),  $t_{(38)} = 2.64$ ,  $p = 0.012$  (Fig.4B top leftward panel), as well as  
787 Congruent Unpredictable distractors (14ms),  $t_{(38)} = 3.61$ ,  $p < 0.001$  (Fig.4B top rightward  
788 panel).

789 *Congruent Unpredictable* distractors principally recruited Map A5 (34ms) during  
790 processing, which was more involved in the processing of these distractors vs. Congruent  
791 Predictable distractors (19ms) distractors,  $t_{(38)} = 2.7$ ,  $p = 0.039$  (Fig.4B middle leftward  
792 panel), as well as Arbitrary Unpredictable (12ms) distractors,  $t_{(38)} = 3.7$ ,  $p < 0.001$  (Fig.4B  
793 middle rightward panel).

794 *Congruent Predictable* distractors recruited different template maps during  
795 processing, where Map A2 was more involved in responses to those distractors (25ms) vs.  
796 Congruent Unpredictable distractors (14ms),  $t_{(38)} = 2.17$ ,  $p = 0.037$ , but not other distractors,  
797  $p$ 's  $> 0.2$  (Fig.4B top leftward panel).

798

799 **Interaction of MSE with contextual factors.** We next analysed the strength- and  
800 topography-based nonlateralised mechanisms contributing to the interactions between  
801 MSE and contextual factors.

802 *Strength-based brain mechanisms.* To gauge the AV-induced enhancements between  
803  $D_{AV}$  and  $D_V$  across the 4 contexts, we explored the abovementioned  $2 \times 2 \times 2$  GFP interaction  
804 using a series of simple follow-up post-hoc tests. We first tested if response strength  
805 between  $D_{AV}$  and  $D_V$  was reliably different within each of the 4 contextual conditions. AV-  
806 induced ERP responses were enhanced (i.e., larger GFP for  $D_{AV}$  than  $D_V$  distractors) for both  
807 Predictable and Unpredictable Congruent distractors, across both earlier and later time-  
808 windows. Likewise, AV enhancements were also found for Arbitrary Predictable distractors,

809 but only in the earlier (102–124ms) time-window. Unpredictable distractors showed similar  
810 GFP across  $D_{AV}$  and  $D_V$  trials. Next, we compared the AV-induced MS enhancements across  
811 the 4 contexts, by creating ( $D_{AV}$  minus  $D_V$ ) difference ERPs for each context. AV-induced  
812 enhancements were weaker for Predictable Arbitrary distractors than Predictable  
813 Congruent distractors (102–124ms and 234–249ms; Figure 5A).

814

815

816

\*\* FIGURE 4 HERE \*\*

817

818

819 *Topography-based brain mechanisms.* We then used the difference ( $D_{AV}$  minus  $D_V$ )  
820 difference ERPs (as in the second part of the GFP analyses) to focus the topographic  
821 clustering selectively on the MSE-related topographic activity. This clustering, carried out on  
822 the 0–300ms post-distractor and pre-target time-window, revealed 7 clusters that explained  
823 78% of the global explained variance within the AV-V target difference ERPs.

824

825 In this topographic clustering there were multiple GFP peaks, with elongated near-  
826 synchronous periods of time where different maps were suggested to be present across the  
827 four distractor conditions in the group-averaged data. One of those maps (Map B3) was first  
828 present in the two congruent distractor conditions, to then become absent and reappear  
829 again. In the view of this patterning, we decided to fit the group-average data from these  
830 three subsequent time-windows to single-subject data: 35–110ms, 110–190ms, and 190–  
831 300ms. To foreshadow the results, in the first and third time-windows the MSE-related  
832 template maps were modulated only by Multisensory Relationship, while in the middle  
833 time-window – by both Multisensory Relationship and Distractor Onset.

834

835 In the first, 35–110ms time-window, the modulation of map presence by  
836 Multisensory Relationship was evidenced by a 2-way Map  $\times$  Multisensory Relationship  
837 interaction,  $F_{(2,1,77.9)} = 9.2$ ,  $p < 0.001$ ,  $\eta_p^2 = 0.2$ . This effect was driven by one map (map B3)  
838 that, in this time-window, predominated responses to Congruent (42ms) vs. Arbitrary  
839 (25ms) distractors,  $t_{(38)} = 4.3$ ,  $p = 0.02$ , whereas another map (map B5) dominated responses  
840 to Arbitrary (33ms) vs. Congruent (18ms) distractors,  $t_{(38)} = 4$ ,  $p = 0.01$  (Figure 5B top and  
841 upper leftward panels, respectively).

842

843 In the second, 110–190ms time-window, map presence was modulated by both  
844 contextual factors, with a 3-way Map  $\times$  Multisensory Relationship  $\times$  Distractor Onset  
845 interaction,  $F_{(2,6,99.9)} = 3.7$ ,  $p = 0.02$ ,  $\eta_p^2 = 0.1$  (just as it did for TAC). We focused follow-up  
846 tests in that time-window again on maps differentiating between the 4 conditions, as we did  
847 for the 3-way interaction for TAC (results of follow-ups as a function of Multisensory  
848 Relationship and Distractor Onset are visible in Figure 5B, middle upper and lower panels,  
849 respectively). Context processes again interacted to modulate the processing of distractors,  
850 although now they did so after the first 100ms. They did so again by engaging different  
851 networks for different combinations of Multisensory Relationship and Distractor Onset:  
852 Arbitrary Predictable distractors - Map B1, Arbitrary Unpredictable distractors - Map B5,  
853 Congruent Unpredictable distractors - Map B6, and now also Congruent Predictable  
854 distractors - Map B3.

855

856

857

\*\* FIGURE 5 HERE \*\*

858

856

857 *Arbitrary Predictable* distractors, which again elicited the weakest GFP, during  
858 processing mainly recruited map B1 (35ms). This map dominated responses to these  
859 distractors vs. Arbitrary Unpredictable distractors (18ms,  $t_{(38)} = 2.8$ ,  $p = 0.01$ ; Figure 5B  
860 upper panel), as well as Congruent Predictable distractors (17ms,  $t_{(38)} = 2.8$ ,  $p = 0.006$ ; Figure  
861 5B lower panel).

862 *Arbitrary Unpredictable* distractors largely recruited during processing one map,  
863 Map B5 (33ms). Map B5 was more involved in responses to these distractors vs. Arbitrary  
864 Predictable distractors (17ms,  $t_{(38)} = 2.6$ ,  $p = 0.042$ ; Figure 5B upper panel), as well as vs.  
865 Congruent Unpredictable distractors (13ms,  $t_{(38)} = 3.4$ ,  $p = 0.002$ ; Figure 5B bottom panel).

866 *Congruent Unpredictable* distractors principally recruited during processing Map B6  
867 (37ms). Map B6 was more involved in responses to these distractors vs. Congruent  
868 Predictable distractors (21ms,  $t_{(38)} = 2.5$ ,  $p = 0.02$ ), and vs. Arbitrary Unpredictable  
869 distractors (24ms,  $t_{(38)} = 2.3$ ,  $p = 0.044$ ).

870 *Congruent Predictable* distractors mostly recruited during processing Map B3 (25ms).  
871 Map B3 was more involved in responses to these distractors vs. Predictable Arbitrary  
872 distractors (8ms,  $t_{(38)} = 2.2$ ,  $p = 0.005$ ), and, at statistical-significance threshold level, vs.  
873 Congruent Unpredictable distractors (12ms,  $t_{(38)} = 2.2$ ,  $p = 0.0502$ ).

874 In the third, 190–300ms time-window, the 2-way Map  $\times$  Multisensory Relationship  
875 interaction was reliable at  $F_{(3,2,121.6)} = 3.7$ ,  $p = 0.01$ ,  $\eta_p^2 = 0.1$ . Notably, the same map as  
876 before (map B3) was more involved, at a non-statistical trend level, in the responses to  
877 Congruent (50ms) vs. Arbitrary distractors (33ms),  $t_{(38)} = 3.6$ ,  $p = 0.08$ , and another map  
878 (map B1) predominated responses to Arbitrary (25ms) vs. Congruent (14ms) distractors,  $t_{(38)}$   
879  $= 2.3$ ,  $p = 0.02$  (Figure 5B rightward panel).

880

881

## 881 Discussion

882

883 Attentional control is necessary to cope with the multitude of stimulation in everyday  
884 situations. However, in such situations, the observer's goals and stimuli's salience routinely  
885 interact with contextual processes, yet such multi-pronged interactions between control  
886 processes have never been studied. Below, we discuss our findings on how visual and  
887 multisensory attentional control interact with distractor temporal predictability and  
888 semantic relationship. We then discuss the spatiotemporal dynamics in nonlateralised brain  
889 mechanisms underlying these interactions. Finally, we discuss how our results enrich the  
890 understanding of attentional control in real-world settings.

891

### 892 Interaction of task-set contingent attentional capture with contextual control

893 Visual control interacted most robustly with stimuli's semantic relationship. Behaviourally,  
894 *target-matching* visual distractors captured attention more strongly when they were  
895 arbitrarily connected than semantically congruent. This was accompanied by a cascade of  
896 modulations of nonlateralised brain responses, spanning both the attentional selection,  
897 N2pc-like stage and much earlier, perceptual stages. Arbitrary distractors, but only  
898 predictable ones, first recruited one particular brain network (Map A1), to a larger extent  
899 than predictable semantically congruent distractors, and did so early on (29–126ms post-  
900 distractor). Arbitrary predictable distractors elicited also suppressed responses, in the later  
901 part of this early time-window (102–124ms; where they elicited the weakest responses). In  
902 the later, N2pc-like (234–249ms) time-window, responses to arbitrary predictable

903 distractors were again weaker, now compared to semantically congruent predictable  
904 distractors.

905         This cascade of network- and strength-based modulations of nonlateralised brain  
906 responses might epitomise a potential brain mechanism for interactions between visual top-  
907 down control and multiple sources of contextual control, as they are consistent with existing  
908 literature. The discovered early (~30-100ms) topographic modulations for predictable target-  
909 matching (compared to unpredictable) distractors is consistent with predictions attenuating  
910 the earliest visual perceptual stages (C1 component, ~50–100ms post-stimulus;  
911 Dassanayake et al. 2016). The subsequent, mid-latency response suppressions (102–124ms,  
912 where we found also topographic modulations) for predictable distractors are in line with N1  
913 attenuations for self-generated sounds (Baess et al. 2011; Klaffehn et al. 2019), and the  
914 latencies where the brain might promote the processing of unexpected events (Press et al.  
915 2020). Notably, these latencies are also in line with the onset (~115ms post-stimulus) of the  
916 goal-based suppression of salient visual distractors (here: presented simultaneously with  
917 targets), i.e., distractor positivity (Pd; Sawaki & Luck 2010). Finally, the response  
918 suppressions we found at later, N2pc-like, attentional selection stages (234–249ms), are  
919 also consistent with some extant (albeit scarce) literature. Van Moorselaar and Slagter  
920 (2019) showed that when such salient visual distractors appear in predictable locations,  
921 they elicit the N2pc but no longer a (subsequent, post-target) Pd, suggesting that once the  
922 brain learns the distractor’s location, it can suppress it without the need for active  
923 inhibition. More recently, van Moorselaar et al. (2020b) showed that the representation of  
924 the predictable distractor feature could be decoded already from pre-stimulus activity.  
925 While our paradigm was not optimised for revealing such effects, pre-stimulus mechanisms  
926 could indeed explain our early-onset (~30ms) context-elicited neural effects. The robust  
927 response suppressions for predictable stimuli are also consistent with recent proposals for  
928 interactions between predictions and auditory attention. Schröger et al. (2015) suggested  
929 that greater attention is deployed to more “salient” stimuli, i.e., those for which a prediction  
930 is missing, so that the predictive model can be reconfigured to encompass such predictions  
931 in the future. This reconfiguration, in turn, requires top-down goal-based attentional  
932 control. Our results extend this model to the visual domain. Our findings involving the  
933 response modulation cascade and behavioural benefits may also support the Schröger et  
934 al.’s tenet that different, but connected, predictive models exist at different levels of the  
935 cortical hierarchy.

936         These existing findings jointly strengthen our interpretations that goal-based top-  
937 down control utilises contextual information to alter visual processing from very early on in  
938 life. Our findings also extend the extant ideas in several ways. First, they show that in  
939 context-rich settings (i.e., involving multiple sources of contextual control), goal-based  
940 control will use both stimulus-related predictions and stimulus meaning to facilitate task-  
941 relevant processing. Second, context information modulates not only early, pre-stimulus  
942 and late, attentional stages, but also early *stimulus-elicited* responses. Third, our findings  
943 also suggest candidate mechanisms for supporting interactions between goal-based control  
944 and multiple sources of contextual information. Namely, context will modulate the early  
945 stimulus processing by recruiting distinct brain networks for stimuli representing different  
946 contexts, e.g., the brain networks recruited by predictable distractors differed for arbitrarily  
947 linked and semantically congruent stimuli (Map A1 and A2, respectively). Also, the distinct  
948 network recruitment might lead to the suppressed (potentially more efficient; c.f. repetition  
949 suppression, Grill-Spector et al. 2006) brain responses. These early response attenuations

950 will extend also to later stages, associated with attentional selection. Thus, it is the early  
951 differential brain network recruitment that might trigger a cascade of spatiotemporal brain  
952 dynamics leading effectively to the stronger behavioural capture, here for predictable  
953 (arbitrary) distractors. However, for distractors, these behavioural benefits may be most  
954 robust for arbitrary target-matching stimuli (as opposed to semantically congruent), with  
955 prediction-based effects are less apparent.

956

### 957 **Interaction of multisensory enhancement of attentional capture with contextual control**

958 Across brain responses, multisensory-induced processes interacted with both contextual  
959 processes. To measure effects related to multisensory-elicited modulations and to its  
960 interactions with contextual information, we analysed AV–V differences within the Target  
961 Difference ERPs.

962 The interactions between multisensory modulations and context processes were  
963 also instantiated via an early-onset cascade of strength- and **topographic** (network-based)  
964 nonlateralised brain mechanisms. This cascade again started early (now 35–110ms post-  
965 distractor). A separate topographic clustering analysis revealed that in the multisensory-  
966 modulated responses the brain first distinguished only between semantically congruent and  
967 arbitrarily linked distractors. These distractors recruited predominantly different brain  
968 networks (Map B3 and B5, respectively). Around the end of these topographic, network-  
969 based modulations, at 102–124ms, multisensory-elicited brain responses were also  
970 modulated in their strength. Arbitrary predictable distractors again triggered weaker  
971 responses, now compared to semantically congruent predictable distractors. Multisensory-  
972 elicited responses predominantly recruited distinct brain networks for the four distractor  
973 types from 110ms until 190ms post-distractor, thus spanning stages linked to perception  
974 and attentional selection. Here, maps B3 and B5 were now recruited for responses to  
975 semantically congruent predictable and arbitrary unpredictable distractors, respectively.  
976 Meanwhile, maps B1 and B6 were recruited for arbitrary predictable and semantically  
977 congruent unpredictable distractors, respectively. In the subsequent time-window (190–  
978 300ms) that mirrors the time-window used in the canonical N2pc analyses, multisensory-  
979 related responses again recruited different brain networks. There, Map B3 (previously:  
980 Congruent Predictable distractors) again was predominantly recruited by semantically  
981 congruent over arbitrary distractors, and now Map B1 (previously: Arbitrary Predictable  
982 distractors) - for arbitrary distractors over congruent ones. In the middle of this time-  
983 window (234–249ms), responses differed in their strength, with predictable arbitrary  
984 distractors eliciting weaker responses compared to semantically congruent predictable  
985 distractors.

986 To summarise, distractors' semantic relationship played a dominant (but not  
987 absolute) role in interactions between multisensory-elicited and contextual processes. The  
988 AV–V difference ERPs were modulated exclusively by multisensory relationships both in the  
989 earliest, perceptual (35–110ms) time-window and latest, N2pc-like (190–300ms) time-  
990 window linked to attentional selection. At both stages, distinct brain networks were  
991 recruited predominantly by semantically congruent and arbitrary distractors. These results  
992 suggest that from early perceptual stages the brain “relays” the processing of (multisensory)  
993 stimuli as a function of them containing meaning (vs. lack thereof) for the observer up to  
994 stages of attentional selection. Notably, the same brain network (Map B3) supported  
995 multisensory processing of semantically congruent distractors across both time-windows,  
996 while different networks were recruited by arbitrarily linked distractors.

997            Thus, a single network might be recruited for processing meaningful multisensory  
998 stimuli. In light of our behavioural results, this brain network could be involved in  
999 suppressing behavioural attentional capture for semantically congruent (over arbitrarily  
1000 linked) distractors by top-down goal-driven attentional control. This idea is supported by the  
1001 interactions between distractors' multisensory-driven modulations, their multisensory  
1002 relationship, and their temporal predictability in the second, 110–190ms time-window.  
1003 Therein, the same “semantic” Map B3 was still present, albeit now recruited for responses  
1004 to semantically congruent (over arbitrary) *predictable* distractors. Based on existing  
1005 evidence that predictions are used in service of goal-based behaviour (Schröger et al. 2015;  
1006 van Moorselaar et al. 2020a; Matusz et al. 2016), one could argue that the brain network  
1007 reflected by Map B3 might play a role in integrating contextual information across both  
1008 predictions and meaning (though mostly meaning, as it remained recruited by semantically  
1009 congruent distractors throughout the distractor-elicited response). The activity of this  
1010 network might have contributed to the overall stronger brain responses (indicated by GFP  
1011 results) to semantically congruent multisensory stimuli, which in turn contributed to the null  
1012 behavioural multisensory enhancements of behavioural indices of attentional capture.  
1013 While these are the first results of this kind, they open an exciting possibility that surface-  
1014 level EEG/ERP studies can reveal the network- and strength-related brain mechanisms  
1015 (potentially a single network for “gain control” up-modulation) by which goal-based  
1016 processes control (i.e., suppress) multisensorily-driven enhancements of attentional  
1017 capture.

1018

#### 1019 **Towards understanding how we pay attention in naturalistic settings**

1020 It is now relatively well-established that the brain facilitates goal-directed processing (from  
1021 perception to attentional selection) via processes based on observer's goals (e.g. Folk et al.  
1022 1992; Desimone & Duncan 1995), predictions about the outside world (Summerfield &  
1023 Egnér 2009; Schröger et al. 2015; Press et al. 2020), and long-term memory contents  
1024 (Summerfield et al. 2006; Peelen & Kastner 2014). Also, multisensory processes are  
1025 increasingly recognised as an important source of bottom-up, attentional control (e.g.  
1026 Spence & Santangelo 2007; Matusz & Eimer 2011; Matusz et al. 2019a; Fleming et al. 2020).  
1027 By studying these processes largely in isolation, researchers clarified how they support goal-  
1028 directed behaviour. However, in the real world, observer's goals interact with multisensory  
1029 processes and multiple types of contextual information. Our study sheds first light on this  
1030 “naturalistic attentional control”.

1031            Understanding of attentional control in the real world has been advanced by  
1032 research on feature-related mechanisms (Theeuwes 1991; Folk et al. 1992; Desimone &  
1033 Duncan 1995; Luck et al. 2020), which support attentional control where target location  
1034 information is missing. Here, we aimed to increase the ecological validity of this research by  
1035 investigating how visual feature-based attention (as indexed by TAC) transpires in context-  
1036 rich, multisensory settings (see SOMs for a discussion of our replication of TAC). Our findings  
1037 of reduced capture for semantically congruent than artificially linked target-colour matching  
1038 distractors is novel and important, as they suggest stimuli's meaning is also utilised to  
1039 suppress attention (to distractors). Until now, known benefits of meaning were limited to  
1040 target selection (Thorpe et al. 1996; Iordanescu et al. 2008; Matusz et al. 2019a). Folk et al.  
1041 (1992) famously demonstrated that attentional capture by distractors is sensitive to the  
1042 observer's goals; we reveal that distractor's meaning may serve as a second source of goal-  
1043 based attentional control. This provides a richer explanation for how we stay focused on

1044 task in everyday situations, despite many objects matching attributes of our current  
1045 behavioural goals.

1046 To summarise, in the real world, attention should be captured more strongly by  
1047 stimuli that are unpredictable (Schröger et al. 2015), but also by those unknown or without  
1048 a clear meaning. On the other hand, stimuli with high strong spatial and/or temporal  
1049 alignment across senses (and so stronger bottom-up salience) may be more resistant to  
1050 such goal-based attentional control (suppression), as we have shown here (multisensory  
1051 enhancement of attentional capture; see also Santangelo & Spence 2007; Matusz & Eimer  
1052 2011; van der Burg et al. 2011; Turoman et al. 2021a; Fleming et al. 2020). As multisensory  
1053 distractors captured attention more strongly even in current, context-rich settings, this  
1054 confirms the importance of multisensory salience as a source of *potential* bottom-up  
1055 attentional control in naturalistic environments (see SOMs for a short discussion of this  
1056 replication).

1057 The investigation of brain mechanisms underlying known EEG/ERP correlates (N2pc,  
1058 for TAC) via advanced multivariate analyses has enabled us to provide a comprehensive,  
1059 novel account of attentional control in a multi-sensory, context-rich setting. Our results  
1060 jointly support the primacy of goal-based control in naturalistic settings. Multisensory  
1061 semantic congruence reduced behavioural attentional capture by target-matching colour  
1062 distractors compared to arbitrarily linked distractors. Context modulated nonlateralised  
1063 brain responses to target-related (TAC) distractors via a cascade of strength- and topographic  
1064 mechanisms from early (~30ms post-distractor) to later, attentional selection stages. While  
1065 these results are first of this kind and need replication, they suggest that context-based  
1066 goal-directed modulations of distractor processing “snowball” from early stages (potentially  
1067 involving pre-stimulus processes, e.g. van Moorselaar & Slagter, 2020) to control  
1068 behavioural attentional selection. Responses to predictable arbitrary (target-matching)  
1069 distractors revealed by our electrical neuroimaging analyses might have driven the larger  
1070 behavioural capture for arbitrary than semantically congruent distractors. The former  
1071 engaged distinct brain networks and triggered the weakest and potentially most efficient  
1072 (Grill-Spector et al. 2006) responses. One reason for the absence of such effects in  
1073 behavioural measures is the small magnitude of behavioural effects: while the TAC effect is  
1074 ~50ms, both MSE effect and semantically-driven suppression were small, at around ~5ms.  
1075 This may also be the reason why context-driven effects were absent in behavioural  
1076 measures of multisensory enhancement of attentional capture, despite involving a complex,  
1077 early-onsetting cascade of strength- and topographic modulations.

1078 Our results point to a potential brain mechanism by which semantic relationships  
1079 influence goal-directed behaviour towards task-irrelevant information. Namely, our  
1080 electrical neuroimaging analyses of surface-level EEG identified a brain network that is  
1081 recruited by semantically congruent stimuli at early, perceptual stages, and that remains  
1082 active at N2pc-like, attentional selection stages. While remaining cautious when interpreting  
1083 our results, this network might have contributed to the consistently enhanced AV-induced  
1084 responses for semantically congruent multisensory distractors. These enhanced brain  
1085 responses together with the concomitant *suppressed behavioural attention* effects are  
1086 consistent with a “gain control” mechanism, in the context of distractor processing (e.g.  
1087 Sawaki & Luck 2010; Luck et al. 2020). Our results reveal that such “gain control”, at least in  
1088 some cases, operates by relaying processing of certain stimuli to distinct brain networks. We  
1089 have purported the existence of such a “gain control” mechanism in a different study on  
1090 (top-down) multisensory attention (e.g. Matusz et al. 2019c). While these are merely



1091 speculations that would require source estimations to be supported, the enhanced  
1092 responses to meaningful distractors may thus reflect enhanced goal-based control over  
1093 those stimuli. Such a process could potentially recruit a network involving the anterior  
1094 hippocampus and putamen, which help maintain active representations of task-relevant  
1095 information while updating the representation of to-be-suppressed information (McNab &  
1096 Klingberg 2008; Sadeh et al. 2010; Jiang et al. 2015). Our electrical neuroimaging analyses of  
1097 the surface-level N2pc data (see also Matusz et al. 2019c; Turoman et al. 2021a) might have  
1098 potentially revealed when and how such memory-related brain networks modulate  
1099 attentional control over task-irrelevant stimuli.

1100

### 1101 **N2pc as an index of attentional control**

1102 We have previously discussed the limitations of canonical N2pc analyses in capturing  
1103 neurocognitive mechanisms by which visual top-down goals and multisensory bottom-up  
1104 salience simultaneously control attention selection (Matusz et al. 2019b). The mean N2pc  
1105 amplitude modulations are commonly interpreted as “gain control”, but they can be driven  
1106 by both strength- (i.e., “gain”) and topographic (network-based) mechanisms. Canonical N2pc  
1107 analyses cannot distinguish between those two brain mechanisms. Contrastingly, Matusz et  
1108 al. (2019b) have shown evidence for both brain mechanisms underlying N2pc-like  
1109 responses. These and other results of ours (Turoman et al. 2021a, 2021b) provided evidence  
1110 from surface-level data for different brain sources contributing to the N2pc’s, a finding that  
1111 has been previously shown only in *source*-level data (Hopf et al. 2000). These findings point  
1112 to a certain limitation of the N2pc (canonically analysed), which is an EEG *correlate* of  
1113 attentional selection, but where other analytical approaches are necessary to reveal brain  
1114 mechanisms of attentional selection.

1115 Here, we have shown that the lateralised, spatially-selective brain mechanisms,  
1116 approximated by the N2pc and revealed by electrical neuroimaging analyses are limited in  
1117 how they contribute to attentional control in some settings. Rich, multisensory, and  
1118 context-laden influences over goal-based top-down attention are, in our current paradigm,  
1119 not captured by such lateralised mechanisms. In contrast, nonlateralised (or at least  
1120 *relatively less* lateralised, see Figures 4 and 5) brain networks seem to support such  
1121 interactions for visual and multisensory distractors - from early on, leading to attentional  
1122 selection. We nevertheless want to reiterate that paradigms that can gauge N2pc offer an  
1123 important starting point for studying attentional control in less traditional multisensory  
1124 and/or context-rich settings. There, multivariate analyses, and an electrical neuroimaging  
1125 framework in particular, might be useful in readily revealing new mechanistic insights into  
1126 attentional control.

1127

### 1128 **Broader implications**

1129 Our findings are important to consider when aiming to study attentional control, and  
1130 information processing more generally, in naturalistic settings (e.g., while viewing movies,  
1131 listening to audiostories) and veridical real-world environments (e.g. the classroom or the  
1132 museum). Additionally, conceptualisations of ecological validity (Peelen et al. 2014; Shamay-  
1133 Tsoory & Mendelsohn 2019; Vanderwal et al. 2019; Eickhoff et al. 2020; Cantlon 2020)  
1134 should go beyond traditionally invoked components (e.g., observer’s goals, context,  
1135 socialness) to encompass contribution of multisensory processes. For example, naturalistic  
1136 studies should compare unisensory and multisensory stimulus/material formats, to  
1137 measure/estimate the contribution of multisensory-driven bottom-up salience to the

1138 processes of interest. More generally, our results highlight that hypotheses about how  
1139 neurocognitive functions operate in everyday situations can be built already in the  
1140 laboratory, if one manipulates systematically, together and across the senses, goals,  
1141 salience, and context (van Atteveldt et al. 2018; Matusz et al. 2019c). Such a cyclical  
1142 approach (Matusz et al. 2019a; see also Naumann et al. 2020 for a new tool to measure  
1143 ecological validity of a study) involving testing of hypotheses across laboratory and veridical  
1144 real-world settings could be highly promising for successfully bridging the two, typically  
1145 separately pursued types of research. As a result, such an approach could create more  
1146 complete theories of naturalistic attentional control.

1147  
1148  
1149  
1150  
1151  
1152  
1153  
1154  
1155  
1156  
1157  
1158  
1159  
1160  
1161  
1162  
1163  
1164  
1165  
1166  
1167  
1168  
1169  
1170  
1171  
1172  
1173  
1174  
1175  
1176  
1177  
1178  
1179  
1180  
1181  
1182  
1183  
1184  
1185  
1186  
1187  
1188

## References

- Alais, D., Newell, F., & Mamassian, P. (2010). Multisensory processing in review: from physiology to behaviour. *Seeing and perceiving*, 23(1), 3-38.
- Baess, P., Horváth, J., Jacobsen, T., & Schröger, E. (2011). Selective suppression of self-initiated sounds in an auditory stream: An ERP study. *Psychophysiology*, 48(9), 1276-1283.
- Bevilacqua, D., Davidesco, I., Wan, L., Chaloner, K., Rowland, J., Ding, M., ... & Dikker, S. (2019). Brain-to-brain synchrony and learning outcomes vary by student–teacher dynamics: Evidence from a real-world classroom electroencephalography study. *Journal of cognitive neuroscience*, 31(3), 401-411.
- Biasiucci, A., Franceschiello, B., & Murray, M. M. (2019). Electroencephalography. *Current*, 29(3), R80-R85.
- Brunet, D., Murray, M. M., & Michel, C. M. (2011). Spatiotemporal analysis of multichannel EEG: CARTOOL. *Computational intelligence and neuroscience*, 2011.
- Burra, N., & Kerzel, D. (2013). Attentional capture during visual search is attenuated by target predictability: Evidence from the N2pc, Pd, and topographic segmentation. *Psychophysiology*, 50(5), 422-430.
- Cantlon, J. F. (2020). The balance of rigor and reality in developmental neuroscience. *NeuroImage*, 216, 116464.
- Cappe, C., Thut, G., Romei, V., & Murray, M. M. (2010). Auditory–visual multisensory interactions in humans: timing, topography, directionality, and sources. *Journal of Neuroscience*, 30(38), 12572-12580.
- Chen, Y. C., & Spence, C. (2010). When hearing the bark helps to identify the dog: Semantically-congruent sounds modulate the identification of masked pictures. *Cognition*, 114(3), 389-404.
- Chennu, S., Noreika, V., Gueorguiev, D., Blenkmann, A., Kochen, S., Ibáñez, A., ... & Bekinschtein, T. A. (2013). Expectation and attention in hierarchical auditory prediction. *Journal of Neuroscience*, 33(27), 11194-11205.
- Chun, M. M., & Jiang, Y. (1998). Contextual cueing: Implicit learning and memory of visual context guides spatial attention. *Cognitive psychology*, 36(1), 28-71.
- Clark, A. (2013). Whatever next? Predictive brains, situated agents, and the future of cognitive science. *Behavioral and brain sciences*, 36(3), 181-204.
- Correa, Á., Lupiáñez, J., & Tudela, P. (2005). Attentional preparation based on temporal expectancy modulates processing at the perceptual level. *Psychonomic bulletin & review*, 12(2), 328-334.
- Coull, J. T., Frith, C. D., Büchel, C., & Nobre, A. C. (2000). Orienting attention in time: behavioural and neuroanatomical distinction between exogenous and endogenous shifts. *Neuropsychologia*, 38(6), 808-819.
- Dassanayake, T. L., Michie, P. T., & Fulham, R. (2016). Effect of temporal predictability on exogenous attentional modulation of feedforward processing in the striate cortex. *International Journal of Psychophysiology*, 105, 9-16.

- 1189 De Meo, R., Murray, M. M., Clarke, S., & Matusz, P. J. (2015). Top-down control and early  
1190 multisensory processes: chicken vs. egg. *Frontiers in integrative neuroscience*, *9*(17),  
1191 1-6.
- 1192 Dell'Acqua, R., Sessa, P., Peressotti, F., Mulatti, C., Navarrete, E., & Grainger, J. (2010). ERP  
1193 evidence for ultra-fast semantic processing in the picture–word interference  
1194 paradigm. *Frontiers in psychology*, *1*, 177.
- 1195 Desimone, R., & Duncan, J. (1995). Neural mechanisms of selective visual attention. *Annual*  
1196 *Review of Neuroscience*, *18*(1), 193-222.
- 1197 Doehrmann, O., & Naumer, M. J. (2008). Semantics and the multisensory brain: How  
1198 meaning modulates processes of audio-visual integration. *Brain Research*, *1242*,  
1199 136–50. <https://doi.org/10.1016/J.BRAINRES.2008.03.071>
- 1200 Duncan, J., & Humphreys, G. W. (1989). Visual search and stimulus similarity. *Psychological*  
1201 *Review*, *96*(3), 433–458.
- 1202 Eickhoff, S. B., Milham, M., & Vanderwal, T. (2020). Towards clinical applications of movie  
1203 fMRI. *Neuroimage*, 116860.
- 1204 Eimer, M. (1996). The N2pc component as an indicator of attentional selectivity.  
1205 *Electroencephalography and Clinical Neurophysiology*, *99*(3), 225–234.
- 1206 Eimer, M. (2014). The neural basis of attentional control in visual search. *Trends in Cognitive*  
1207 *Sciences*, *18*(10), 526-535.
- 1208 Eimer, M., & Kiss, M. (2008). Involuntary attentional capture is determined by task set:  
1209 Evidence from event-related brain potentials. *Journal of cognitive*  
1210 *neuroscience*, *20*(8), 1423-1433.
- 1211 Eimer, M., Kiss, M., Press, C., & Sauter, D. (2009). The roles of feature-specific task set and  
1212 bottom-up salience in attentional capture: An ERP study. *Journal of Experimental*  
1213 *Psychology: Human Perception and Performance*, *35*(5), 1316–1328.
- 1214 Ernst, M. O. (2007). Learning to integrate arbitrary signals from vision and touch. *Journal of*  
1215 *Vision*, *7*(5), 7-7.
- 1216 Fleming, J. T., Noyce, A. L., & Shinn-Cunningham, B. G. (2020). Audio-visual spatial alignment  
1217 improves integration in the presence of a competing audio-visual  
1218 stimulus. *Neuropsychologia*, *146*, 107530.
- 1219 Folk, C. L., Leber, A. B., & Egeth, H. E. (2002). Made you blink! Contingent attentional  
1220 capture produces a spatial blink. *Perception & psychophysics*, *64*(5), 741-753.
- 1221 Folk, C. L., Remington, R. W., & Johnston, J. C. (1992). Involuntary covert orienting is  
1222 contingent on attentional control settings. *Journal of Experimental Psychology:*  
1223 *Human Perception and Performance*, *18*(4), 1030–1044.
- 1224 Gaspelin, N., & Luck, S. J. (2019). Inhibition as a potential resolution to the attentional  
1225 capture debate. *Current opinion in psychology*, *29*, 12-18.
- 1226 Gazzaley, A., & Nobre, A. C. (2012). Top-down modulation: bridging selective attention and  
1227 working memory. *Trends in cognitive sciences*, *16*(2), 129-135.
- 1228 Ghazanfar, A. A., Maier, J. X., Hoffman, K. L., & Logothetis, N. K. (2005). Multisensory  
1229 integration of dynamic faces and voices in rhesus monkey auditory cortex. *Journal of*  
1230 *Neuroscience*, *25*(20), 5004-5012.

- 1231 Girelli, M., & Luck, S. J. (1997). Are the same attentional mechanisms used to detect visual  
1232 search targets defined by color, orientation, and motion? *Journal of Cognitive*  
1233 *Neuroscience*, 9(2), 238-253.
- 1234 Golumbic, E. M. Z., Poeppel, D., & Schroeder, C. E. (2012). Temporal context in speech  
1235 processing and attentional stream selection: a behavioral and neural  
1236 perspective. *Brain and language*, 122(3), 151-161.
- 1237 Green, J. J., & McDonald, J. J. (2010). The role of temporal predictability in the anticipatory  
1238 biasing of sensory cortex during visuospatial shifts of  
1239 attention. *Psychophysiology*, 47(6), 1057-1065.
- 1240 Grill-Spector, K., Henson, R., & Martin, A. (2006). Repetition and the brain: neural models of  
1241 stimulus-specific effects. *Trends in Cognitive Sciences*, 10(1), 14-23.
- 1242 Guthrie, D., & Buchwald, J. S. (1991). Significance testing of difference potentials.  
1243 *Psychophysiology*, 28(2), 240-244.
- 1244 Hickey, C., Di Lollo, V., & McDonald, J. J. (2008). Target and distractor processing in visual  
1245 search: Decomposition of the N2pc. *Visual Cognition*, 16(1), 110-113.
- 1246 Hickey, C., Di Lollo, V., & McDonald, J. J. (2009). Electrophysiological indices of target and  
1247 distractor processing in visual search. *Journal of cognitive neuroscience*, 21(4), 760-  
1248 775.
- 1249 Holm, S. (1979). A Simple Sequentially Rejective Multiple Test Procedure. *Scandinavian*  
1250 *Journal of Statistics*, 6(2), 65-70.
- 1251 Hopf, J.-M., Luck, S. J., Girelli, M., Mangun, G. R., Scheich, H., & Heinze, H.-J. (2000). Neural  
1252 sources of focused attention in visual search. *Cerebral Cortex*, 10, 1233-1241.
- 1253 Huth, A. G., Lee, T., Nishimoto, S., Bilenko, N. Y., Vu, A. T., & Gallant, J. L. (2016). Decoding  
1254 the semantic content of natural movies from human brain activity. *Frontiers in*  
1255 *systems neuroscience*, 10, 81.  
1256 induced gamma band responses reflect cross-modal interactions in familiar object  
1257 recognition. *Journal of Neuroscience*, 27(5), 1090-1096.
- 1258 Iordanescu, L., Guzman-Martinez, E., Grabowecky, M., & Suzuki, S. (2008). Characteristic  
1259 sounds facilitate visual search. *Psychonomic Bulletin & Review*, 15(3), 548-554.
- 1260 Jiang, J., Brashier, N. M., & Egner, T. (2015). Memory meets control in hippocampal and  
1261 striatal binding of stimuli, responses, and attentional control states. *Journal of*  
1262 *Neuroscience*, 35, 14885-14895.
- 1263 Kingstone, A., Smilek, D., Ristic, J., Kelland Friesen, C., & Eastwood, J. D. (2003). Attention,  
1264 researchers! It is time to take a look at the real world. *Current Directions in*  
1265 *Psychological Science*, 12(5), 176-180.
- 1266 Kiss, M., Jolicœur, P., Dell'Acqua, R., & Eimer, M. (2008a). Attentional capture by visual  
1267 singletons is mediated by top-down task set: New evidence from the N2pc  
1268 component. *Psychophysiology*, 45(6), 1013-1024.
- 1269 Kiss, M., Van Velzen, J., & Eimer, M. (2008b). The N2pc component and its links to attention  
1270 shifts and spatially selective visual processing. *Psychophysiology*, 45, 240-249.
- 1271 Klaffehn, A. L., Baess, P., Kunde, W., & Pfister, R. (2019). Sensory attenuation prevails when  
1272 controlling for temporal predictability of self-and externally generated  
1273 tones. *Neuropsychologia*, 132, 107145.

- 1274 Koenig, T., Stein, M., Grieder, M., & Kottlow, M. (2014). A tutorial on data-driven methods  
1275 for statistically assessing ERP topographies. *Brain topography*, 27(1), 72-83.
- 1276 Kuo, B. C., Nobre, A. C., Scerif, G., & Astle, D. E. (2016). Top-Down activation of spatiotopic  
1277 sensory codes in perceptual and working memory search. *Journal of cognitive*  
1278 *neuroscience*, 28(7), 996-1009.
- 1279 Laurienti, P. J., Burdette, J. H., Maldjian, J. A., & Wallace, M. T. (2006). Enhanced  
1280 multisensory integration in older adults. *Neurobiology of aging*, 27(8), 1155-1163.
- 1281 Lehmann, D. (1987). "Principles of spatial analysis," in *Methods of Analysis of Brain Electrical*  
1282 *and Magnetic Signals*, A. S. Gevins and A. Remont, Eds., pp. 309-354. Elsevier:  
1283 Amsterdam, The Netherlands.
- 1284 Lehmann D, Skrandies W (1980): Reference-free identification of components of  
1285 checkerboard evoked multichannel potential fields. *Electroencephalography in*  
1286 *Clinical Neurology*, 48, 609-621.
- 1287 Lehmann, D., Ozaki, H., & Pal, I. (1987). EEG alpha map series: brain micro-states by space-  
1288 oriented adaptive segmentation. *Electroencephalography and clinical*  
1289 *neurophysiology*, 67(3), 271-288.
- 1290 Lien, M. C., Ruthruff, E., Goodin, Z., & Remington, R. W. (2008). Contingent attentional  
1291 capture by top-down control settings: converging evidence from event-related  
1292 potentials. *Journal of Experimental Psychology: Human Perception and*  
1293 *Performance*, 34(3), 509.
- 1294 Luck, S. J., Gaspelin, N., Folk, C. L., Remington, R. W., & Theeuwes, J. (2020). Progress  
1295 toward resolving the attentional capture debate. *Visual Cognition*, 1-21. DOI:  
1296 10.1080/13506285.2020.1848949
- 1297 Luck, S. J., & Hillyard, S. A. (1994a). Electrophysiological correlates of feature analysis during  
1298 visual search. *Psychophysiology*, 31, 291-308.
- 1299 Luck, S. J., & Hillyard, S. A. (1994b). Spatial filtering during visual search: Evidence from  
1300 human electrophysiology. *Journal of Experimental Psychology: Human Perception*  
1301 *and Performance*, 20(5), 1000-1014.
- 1302 Lunn, J., Sjoblom, A., Ward, J., Soto-Faraco, S., & Forster, S. (2019). Multisensory  
1303 enhancement of attention depends on whether you are already paying  
1304 attention. *Cognition*, 187, 38-49.
- 1305 Luo, H., & Poeppel, D. (2007). Phase patterns of neuronal responses reliably discriminate  
1306 speech in human auditory cortex. *Neuron*, 54(6), 1001-1010.
- 1307 Matusz, P. J., & Eimer, M. (2013). Top-down control of audiovisual search by bimodal search  
1308 templates. *Psychophysiology*, 50(10), 996-1009.
- 1309 Matusz, P. J., & Eimer, M. (2011). Multisensory enhancement of attentional capture in visual  
1310 search. *Psychonomic bulletin & review*, 18(5), 904.
- 1311 Matusz, P. J., Wallace, M. T., & Murray, M. M. (2020). Multisensory contributions to object  
1312 recognition and memory across the life span. In *Multisensory Perception* (pp. 135-  
1313 154). Academic Press.
- 1314 Matusz, P. J., Dikker, S., Huth, A. G., & Perrodin, C. (2019a). Are We Ready for Real-world  
1315 Neuroscience?. *Journal of cognitive neuroscience*, 31(3), 327.

- 1316 Matusz, P. J., Turoman, N., Tivadar, R. I., Retsa, C., & Murray, M. M. (2019b). Brain and  
1317 cognitive mechanisms of top-down attentional control in a multisensory world:  
1318 Benefits of electrical neuroimaging. *Journal of cognitive neuroscience*, *31*(3), 412-  
1319 430.
- 1320 Matusz, P. J., Merkley, R., Faure, M., & Scerif, G. (2019c). Expert attention: Attentional  
1321 allocation depends on the differential development of multisensory number  
1322 representations. *Cognition*, *186*, 171-177.
- 1323 Matusz, P. J., Key, A. P., Gogliotti, S., Pearson, J., Auld, M. L., Murray, M. M., & Maitre, N. L.  
1324 (2018). Somatosensory plasticity in pediatric cerebral palsy following constraint-  
1325 induced movement therapy. *Neural Plasticity*, *2018*.
- 1326 Matusz, P. J., Wallace, M. T., & Murray, M. M. (2017). A multisensory perspective on object  
1327 memory. *Neuropsychologia*, *105*, 243-252.
- 1328 Matusz, P. J., Retsa, C., & Murray, M. M. (2016). The context-contingent nature of cross-  
1329 modal activations of the visual cortex. *Neuroimage*, *125*, 996-1004.
- 1330 Matusz, P. J., Thelen, A., Amrein, S., Geiser, E., Anken, J., & Murray, M. M. (2015a). The role  
1331 of auditory cortices in the retrieval of single-trial auditory-visual object  
1332 memories. *European Journal of Neuroscience*, *41*(5), 699-708.
- 1333 Matusz, P. J., Broadbent, H., Ferrari, J., Forrest, B., Merkley, R., & Scerif, G. (2015b). Multi-  
1334 modal distraction: Insights from children's limited attention. *Cognition*, *136*, 156-  
1335 165.
- 1336 McNab, F., & Klingberg, T. (2008). Prefrontal cortex and basal ganglia control access to  
1337 working memory. *Nature Neuroscience*, *11*, 103-107.
- 1338 Michel, C. M., & Murray, M. M. (2012). Towards the utilization of EEG as a brain imaging  
1339 tool. *Neuroimage*, *61*(2), 371-385.
- 1340 Miniussi C, Wilding EL, Coull JT, Nobre AC. (1999). Orienting atten- tion in the time domain:  
1341 modulation of potentials. *Brain*, *122*, 1507-18.
- 1342 Murray, M. M., Brunet, D., & Michel, C. M. (2008). Topographic ERP analyses: a step-by-step  
1343 tutorial review. *Brain topography*, *20*(4), 249-264.
- 1344 Murray, M. M., Thelen, A., Thut, G., Romei, V., Martuzzi, R., & Matusz, P. J. (2016a). The  
1345 multisensory function of the human primary visual cortex. *Neuropsychologia*, *83*,  
1346 161-169.
- 1347 Murray, M. M., Lewkowicz, D. J., Amedi, A., & Wallace, M. T. (2016b). Multisensory  
1348 processes: a balancing act across the lifespan. *Trends in Neurosciences*, *39*(8), 567-  
1349 579.
- 1350 Murray, M. M., Michel, C. M., De Peralta, R. G., Ortigue, S., Brunet, D., Andino, S. G., &  
1351 Schnider, A. (2004). Rapid discrimination of visual and multisensory memories  
1352 revealed by electrical neuroimaging. *Neuroimage*, *21*(1), 125-135.
- 1353 Naccache, L., Blandin, E., & Dehaene, S. (2002). Unconscious masked priming depends on  
1354 temporal attention. *Psychological Science*, *13*(5), 416-424.
- 1355 Nastase, S. A., Goldstein, A., & Hasson, U. (2020). Keep it real: rethinking the primacy of  
1356 experimental control in cognitive neuroscience. *Neuroimage*. In print.

- 1357 Naumann, S., Byrne, M. L., de la Fuente, L. A., Harrewijn, A., Nugiel, T., Rosen, M. L., ... &  
1358 Matusz, P. J. (2020). Assessing the degree of ecological validity of your study:  
1359 Introducing the Ecological Validity Assessment (EVA) Tool. *PsyArXiv*. DOI:  
1360 10.31234/osf.io/qb9tz.
- 1361 Neel, M. L., Yoder, P., Matusz, P. J., Murray, M. M., Miller, A., Burkhardt, S., ... & Maitre, N.  
1362 L. (2019). Randomized controlled trial protocol to improve multisensory neural  
1363 processing, language and motor outcomes in preterm infants. *BMC Pediatrics*, *19*(1),  
1364 1-10.
- 1365 Noonan, M. P., Crittenden, B. M., Jensen, O., & Stokes, M. G. (2018). Selective inhibition of  
1366 distracting input. *Behavioural brain research*, *355*, 36-47.
- 1367 Peelen, M. V., & Kastner, S. (2014). Attention in the real world: toward understanding its  
1368 neural basis. *Trends in cognitive sciences*, *18*(5), 242-250.
- 1369 Perrin, F., Pernier, J., Bertrand, O., Giard, M. H., & Echallier, J. F. (1987). Mapping of scalp  
1370 potentials by surface spline interpolation. *Electroencephalography and clinical  
1371 neurophysiology*, *66*(1), 75-81.
- 1372 Press, C., Kok, P., & Yon, D. (2020). The perceptual prediction paradox. *Trends in Cognitive  
1373 Sciences*, *24*(1), 13-24.
- 1374 Raij, T., Ahveninen, J., Lin, F. H., Witzel, T., Jääskeläinen, I. P., Letham, B., ... & Hämäläinen,  
1375 M. (2010). Onset timing of cross-sensory activations and multisensory interactions in  
1376 auditory and visual sensory cortices. *European Journal of Neuroscience*, *31*(10),  
1377 1772-1782.
- 1378 Raij, T., Uutela, K., & Hari, R. (2000). Audiovisual integration of letters in the human  
1379 brain. *Neuron*, *28*(2), 617-625.
- 1380 Retsa, C., Matusz, P. J., Schnupp, J. W., & Murray, M. M. (2018). What's what in auditory  
1381 cortices?. *NeuroImage*, *176*, 29-40.
- 1382 Retsa, C., Matusz, P. J., Schnupp, J. W., & Murray, M. M. (2020). Selective attention to sound  
1383 features mediates cross-modal activation of visual cortices. *Neuropsychologia*, *144*,  
1384 107498.
- 1385 Richter, D., Ekman, M., & de Lange, F. P. (2018). Suppressed sensory response to predictable  
1386 object stimuli throughout the ventral visual stream. *Journal of Neuroscience*, *38*(34),  
1387 7452-7461.
- 1388 Rohenkohl, G., Gould, I. C., Pessoa, J., & Nobre, A. C. (2014). Combining spatial and temporal  
1389 expectations to improve visual perception. *Journal of vision*, *14*(4), 8-8.
- 1390 Sadeh, T., Shohamy, D., Levy, D. R., Reggev, N., & Maril, A. (2011). Cooperation between the  
1391 hippocampus and the striatum during episodic encoding. *Journal of Cognitive  
1392 Neuroscience*, *23*(7), 1597-1608.
- 1393 Sarmiento, B. R., Matusz, P. J., Sanabria, D., & Murray, M. M. (2016). Contextual factors  
1394 multiplex to control multisensory processes. *Human brain mapping*, *37*(1), 273-288.
- 1395 Sawaki, R., & Luck, S. J. (2010). Capture versus suppression of attention by salient  
1396 singletons: Electrophysiological evidence for an automatic attend-to-me  
1397 signal. *Attention, Perception, & Psychophysics*, *72*(6), 1455-1470.



- 1398 Schröger, E., Marzecová, A., & SanMiguel, I. (2015). Attention and prediction in human  
1399 audition: A lesson from cognitive psychophysiology. *European Journal of*  
1400 *Neuroscience*, 41(5), 641-664.
- 1401 Shamay-Tsoory, S. G., & Mendelsohn, A. (2019). Real-life neuroscience: an ecological  
1402 approach to brain and behavior research. *Perspectives on Psychological*  
1403 *Science*, 14(5), 841-859.
- 1404 Soto-Faraco, S., Kvasova, D., Biau, E., Ikumi, N., Ruzzoli, M., Morís-Fernández, L., & Torralba,  
1405 M. (2019). *Multisensory interactions in the real world*. Cambridge University Press.
- 1406 Southwell, R., Baumann, A., Gal, C., Barascud, N., Friston, K., & Chait, M. (2017). Is  
1407 predictability salient? A study of attentional capture by auditory  
1408 patterns. *Philosophical Transactions of the Royal Society B: Biological*  
1409 *Sciences*, 372(1714), 20160105.
- 1410 Spierer, L., Manuel, A. L., Buetti, D., & Murray, M. M. (2013). Contributions of pitch and  
1411 bandwidth to sound-induced enhancement of visual cortex excitability in  
1412 humans. *Cortex*, 49(10), 2728-2734.
- 1413 Sui, J., He, X., & Humphreys, G. W. (2012). Perceptual effects of social salience: evidence  
1414 from self-prioritization effects on perceptual matching. *Journal of Experimental*  
1415 *Psychology: Human perception and performance*, 38(5), 1105.
- 1416 Summerfield, C., & Egner, T. (2009). Expectation (and attention) in visual cognition. *Trends*  
1417 *in cognitive sciences*, 13(9), 403-409.
- 1418 Summerfield, J. J., Lepsien, J., Gitelman, D. R., Mesulam, M. M., & Nobre, A. C. (2006).  
1419 Orienting attention based on long-term memory experience. *Neuron*, 49(6), 905-916.
- 1420 Sun, Y., Fuentes, L. J., Humphreys, G. W., & Sui, J. (2016). Try to see it my way: Embodied  
1421 perspective enhances self and friend-biases in perceptual matching. *Cognition*, 153,  
1422 108-117.
- 1423 Talsma, D., & Woldorff, M. G. (2005). Selective attention and multisensory integration:  
1424 multiple phases of effects on the evoked brain activity. *Journal of Cognitive*  
1425 *Neuroscience*, 17, 1098-1114.
- 1426 Ten Oever, S., & Sack, A. T. (2015). Oscillatory phase shapes syllable perception. *Proceedings*  
1427 *of the National Academy of Sciences*, 112(52), 15833-15837.
- 1428 Ten Oever, S., Romei, V., van Atteveldt, N., Soto-Faraco, S., Murray, M. M., & Matusz, P. J.  
1429 (2016). The COGs (context, object, and goals) in multisensory  
1430 processing. *Experimental brain research*, 234(5), 1307-1323.
- 1431 Theeuwes, J. (1991). Cross-dimensional perceptual selectivity. *Perception & Psychophysics*,  
1432 50(2), 184-193.
- 1433 Thelen, A., Talsma, D., & Murray, M.M. (2015). Single-trial multisensory memories affect  
1434 later auditory and visual object discrimination. *Cognition* 138, 148-160.
- 1435 Thorpe, S., Fize, D., & Marlot, C. (1996). Speed of processing in the human visual  
1436 system. *Nature*, 381(6582), 520-522.
- 1437 Tivadar, R. I., & Murray, M. M. (2019). A primer on electroencephalography and event-  
1438 related potentials for organizational neuroscience. *Organizational Research*  
1439 *Methods*, 22(1), 69-94.

- 1440 Tivadar, R. I., Knight, R. T., & Tzovara, A. (2021). Automatic Sensory Predictions: A Review of  
1441 Predictive Mechanisms in the Brain and Their Link to Conscious Processing. *Frontiers*  
1442 *in Human Neuroscience*, 438.
- 1443 Tovar, D. A., Murray, M. M., & Wallace, M. T. (2020). Selective enhancement of object  
1444 representations through multisensory integration. *Journal of Neuroscience*. In press.  
1445 DOI: <https://doi.org/10.1523/JNEUROSCI.2139-19.2020>
- 1446 Treisman, A. M., & Gelade, G. (1980). A feature-integration theory of attention. *Cognitive*  
1447 *Psychology*, 12(1), 97–136.
- 1448 Turoman, N., Tivadar, R. I., Retsa, C., Maillard, A. M., Scerif, G., and Matusz, P. J. (2021a).  
1449 The development of attentional control mechanisms in multisensory environments.  
1450 *Developmental Cognitive Neuroscience*, 48, 100930.
- 1451 Turoman, N., Tivadar, R. I., Retsa, C., Maillard, A. M., Scerif, G., and Matusz, P. (2021b).  
1452 Uncovering the mechanisms of real-world attentional control over the course of  
1453 primary education. *Mind, Brain, & Education*. In press.
- 1454 Tzovara, A., Murray, M. M., Michel, C. M., & De Lucia, M. (2012). A tutorial review of  
1455 electrical neuroimaging from group-average to single-trial event-related  
1456 potentials. *Developmental neuropsychology*, 37(6), 518-544.
- 1457 Van Atteveldt, N., Murray, M. M., Thut, G., & Schroeder, C. E. (2014). Multisensory  
1458 integration: flexible use of general operations. *Neuron*, 81(6), 1240-1253.
- 1459 van Atteveldt, N., van Kesteren, M. T. R., Braams, B.; Krabbendam, L. (2018). Neuroimaging  
1460 of learning and development: improving ecological validity. *Frontline Learning*  
1461 *Research*, 6 (3), 186–203. DOI: 10.14786/flr.v6i3.366.
- 1462 Van der Burg, E., Talsma, D., Olivers, C. N. L., Hickey, C., & Theeuwes, J. (2011). Early  
1463 multisensory interactions affect the competition among multiple visual objects.  
1464 *NeuroImage*, 55, 1208–1218.
- 1465 van Moorselaar, D., & Slagter, H. A. (2019). Learning what is irrelevant or relevant:  
1466 Expectations facilitate distractor inhibition and target facilitation through distinct  
1467 neural mechanisms. *Journal of Neuroscience*, 39(35), 6953-6967.
- 1468 van Moorselaar, D., & Slagter, H. A. (2020). Inhibition in selective attention. *Annals of the*  
1469 *New York Academy of Sciences*, 1464(1), 204.
- 1470 van Moorselaar, D., Daneshtalab, N., & Slagter, H. (2020). Neural mechanisms underlying  
1471 distractor inhibition on the basis of feature and/or spatial expectations. bioRxiv.
- 1472 Vanderwal, T., Eilbott, J.; Castellanos, F. X (2019). Movies in the magnet: Naturalistic  
1473 paradigms in developmental functional neuroimaging. *Developmental Cognitive*  
1474 *Neuroscience*, 36, 100600.
- 1475 Vaughan Jr, H. G. (1982). The neural origins of human event-related potentials. *Annals of the*  
1476 *New York Academy of Sciences*, 388(1), 125-138.
- 1477 Widmann, A., Schröger, E., & Maess, B. (2015). Digital filter design for electrophysiological  
1478 data—a practical approach. *Journal of Neuroscience Methods*, 250, 34-46.
- 1479 Wu, R., Nako, R., Band, J., Pizzuto, J., Ghoreishi, Y., Scerif, G., & Aslin, R. (2015). Rapid  
1480 attentional selection of non-native stimuli despite perceptual narrowing. *Journal of*  
1481 *Cognitive Neuroscience*, 27(11), 2299-2307.

1482 Yuval-Greenberg, S., & Deouell, L. Y. (2007). What you see is not (always) what you hear:  
1483 induced gamma band responses reflect cross-modal interactions in familiar object  
1484 recognition. *Journal of Neuroscience*, 27(5), 1090-1096.

1485  
1486  
1487  
1488  
1489  
1490  
1491  
1492  
1493

#### 1494 **Acknowledgments**

1495

1496 We thank The EEG Brain Mapping Core of the Center for Biomedical Imaging (CIBM) for  
1497 providing the infrastructure. This project was supported by the Pierre Mercier Foundation  
1498 to P.J.M. Financial support was likewise provided by the Swiss National Science Foundation  
1499 (grants: 320030\_149982 and 320030\_169206 to M.M.M., PZ00P1\_174150 to P.J.M., the  
1500 National Centre of Competence in research project “SYNAPSY, The Synaptic Bases of Mental  
1501 Disease” [project 51AU40\_125759]), and grantor advised by Carigest SA (232920) to  
1502 M.M.M.. P.J.M. and M.M.M. are both supported by Fondation Asile des Aveugles.

1503  
1504  
1505  
1506  
1507  
1508  
1509  
1510  
1511  
1512  
1513  
1514  
1515  
1516  
1517  
1518  
1519  
1520  
1521  
1522  
1523  
1524  
1525  
1526  
1527  
1528

1529  
1530  
1531  
1532  
1533  
1534  
1535  
1536  
1537  
1538  
1539  
1540  
1541  
1542  
1543

#### 1544 **Figure Legends**

1545  
1546  
1547  
1548  
1549  
1550  
1551  
1552  
1553  
1554  
1555  
1556  
1557  
1558  
1559  
1560

**Figure 1. A)** An example trial of the general experimental “Task” is shown, with four successive arrays. The white circle around the target location (here the target is a blue diamond) and the corresponding distractor location serves to highlight, in this case, a target-matching distractor colour condition, with a concomitant sound, i.e., TCCAV. **B)** The order of Tasks, with the corresponding conditions of Multisensory Relationship in red, and Distractor Onset in green, shown separately for each Task, in the successive order in which they appeared in the study. Under each condition, its operationalisation is given in brackets in the corresponding colour. Predictable and unpredictable blocks before and after the training (1 & 2 and 3 & 4, respectively) were counterbalanced across participants. **C)** Events that were part of the Training. Association phase: an example pairing option (red – high pitch, blue – low pitch) with trial progression is shown. Testing phase: the pairing learnt in the Association phase would be tested using a colour word or a string of x’s in the respective colour. Participants had to indicate whether the pairing was correct via a button press, after which feedback was given.

1561  
1562  
1563  
1564  
1565  
1566  
1567  
1568  
1569  
1570  
1571  
1572  
1573

**Figure 2.** The violin plots show the attentional capture effects (spatial cueing in milliseconds) for TCC and NCC distractors, and the distributions of single-participant scores according to whether Multisensory Relationship within these distractors was Arbitrary (light green) or Congruent (dark green). The dark grey boxes within each violin plot show the interquartile range from the 1<sup>st</sup> to the 3<sup>rd</sup> quartile, and white dots in the middle of these boxes represent the median. Larger values indicate *positive* behavioural capture effects (RTs faster on trials where distractor and target appeared in same vs. different location), while below-zero values – *inverted* capture effects (RTs slower on trials where distractor and target appeared in same vs. different location). Larger behavioural capture elicited by target-colour distractors (TCC) was found for arbitrary than semantically congruent distractors. Expectedly, regardless of Multisensory Relationship, attentional capture was larger for target-colour (TCC) distractors than for non-target colour distractors (NCC).

1574  
1575

**Figure 3.** Overall contra- and ipsilateral ERP waveforms representing a mean amplitude over electrode clusters (plotted on the head model at the bottom of the figure in blue and black),

1576 separately for each of the four experimental conditions (Distractor Colour x Distractor  
1577 Modality), averaged across all four Tasks. The N2pc time-window of 180–300ms following  
1578 distractor onset is highlighted in grey, and significant contra-ipsi differences are marked  
1579 with an asterisk ( $p < 0.05$ ). As expected, only the TCC distractors elicited statistically  
1580 significant contra-ipsi differences.

1581

1582 **Figure 4.** Nonlateralised GFP and topography results for the visual only difference ERPs (DV  
1583 condition of Target Difference), as a proxy for TAC. **A)** Mean GFP over the post-distractor  
1584 and pre-target time-period across the 4 experimental tasks (as a function of the levels of  
1585 Multisensory Relationship and Distractor Onset that they represent), as denoted by the  
1586 colours on the legend. The time-windows of interest (102–124ms and 234–249ms) are  
1587 highlighted by grey areas. **B)** Template maps over the post-distractor time-period as  
1588 revealed by the topographic clustering (Maps A1 to A5) are shown in top panels. In lower  
1589 panels are the results of the fitting procedure over the 29–126ms time-window. The results  
1590 displayed here are the follow-up tests of the 3-way Map x Multisensory Relationship x  
1591 Distractor Onset interaction as a function of Multisensory Relationship (leftward panel) and  
1592 of Distractor Onset (rightward panel). Bars are coloured according to the template maps  
1593 that they represent. Conditions are represented by full colour or patterns per the legend.  
1594 Error bars represent standard errors of the mean.

1595

1596 **Figure 5.** Nonlateralised GFP and topography results for the difference ERPs between the  
1597 DAV and DV conditions of Target Difference, as a proxy for MSE. **A)** Mean GFP over the post-  
1598 distractor and pre-target time-period across the 4 experimental tasks (as a function of the  
1599 levels of Multisensory Relationship and Distractor Onset that they represent), as denoted by  
1600 the colours on the legend. The time-windows of interest (102–124ms and 234–249ms) are  
1601 highlighted by grey bars. **B)** Template maps over the post-distractor time-period as revealed  
1602 by the topographic clustering (Maps A1 to A7) are shown on top. Below are the results of  
1603 the fitting procedure over the three time-windows: 35–110, 110–190, and 190–300 time-  
1604 window. Here we display the follow-ups of the interactions observed in each time-window:  
1605 in 35–110 and 190–300 time-windows, the 2-way Map x Multisensory Relationship  
1606 interaction (leftward and rightward panels, respectively), and in the 110–190 time-window,  
1607 follow-ups of the 3-way Map x Multisensory Relationship x Distractor Onset interaction as a  
1608 function of Multisensory Relationship and of Distractor Onset (middle panel). Bars are  
1609 coloured according to the template maps that they represent. Conditions are represented  
1610 by full colour or patterns per the legend. Error bars represent standard errors of the mean.

1611

1612

1613

1614

1615

1616

1617

1618

1619

1620

1621

1622

1623  
1624  
1625  
1626  
1627  
1628  
1629  
1630  
1631  
1632  
1633  
1634  
1635  
1636  
1637  
1638

**Figure 1**

### A) General trial sequence across Tasks

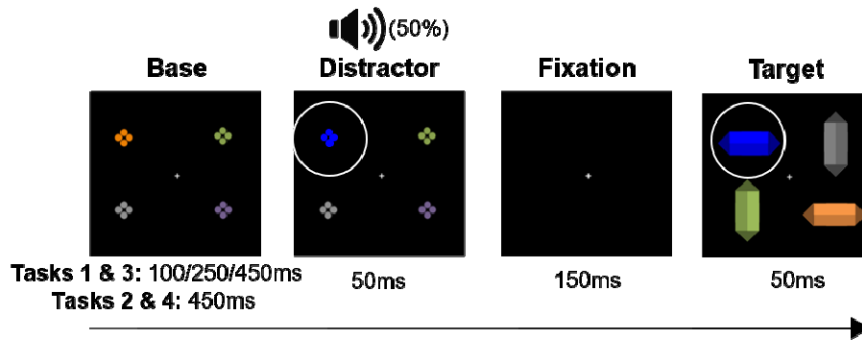

### B) Overall structure of the study

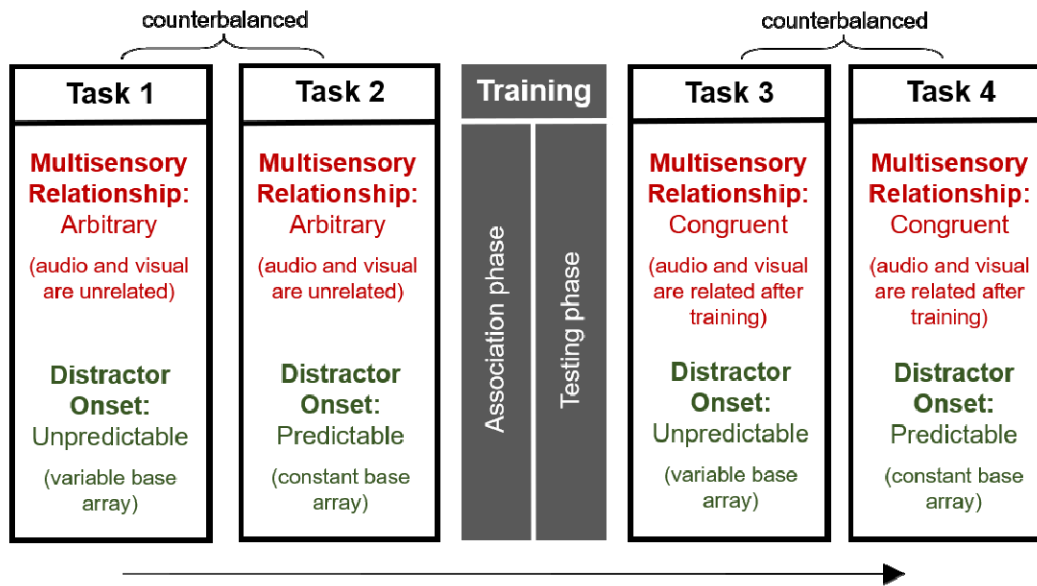

### C) Training of semantic audio-visual associations for distractors

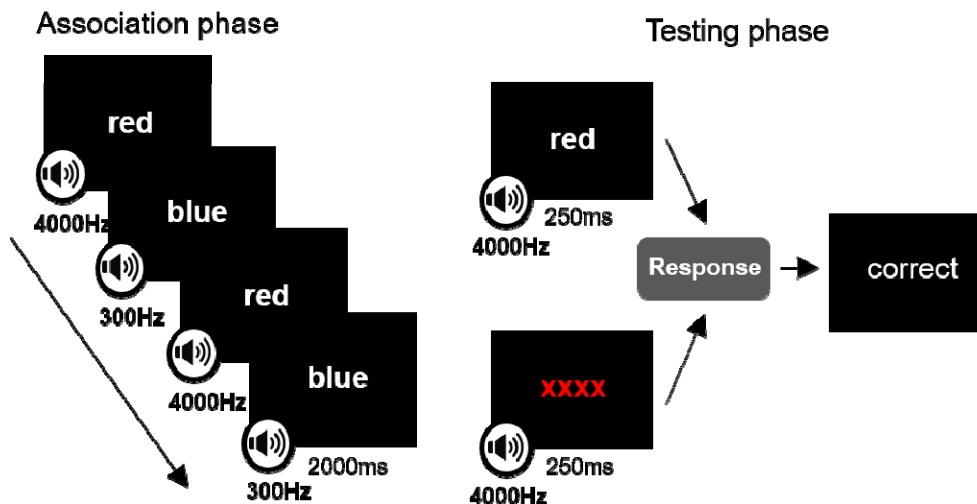

1639  
1640  
1641

Figure 2

## Behavioural attentional capture

### Interaction between Task-set contingent attentional capture and Multisensory Relationship

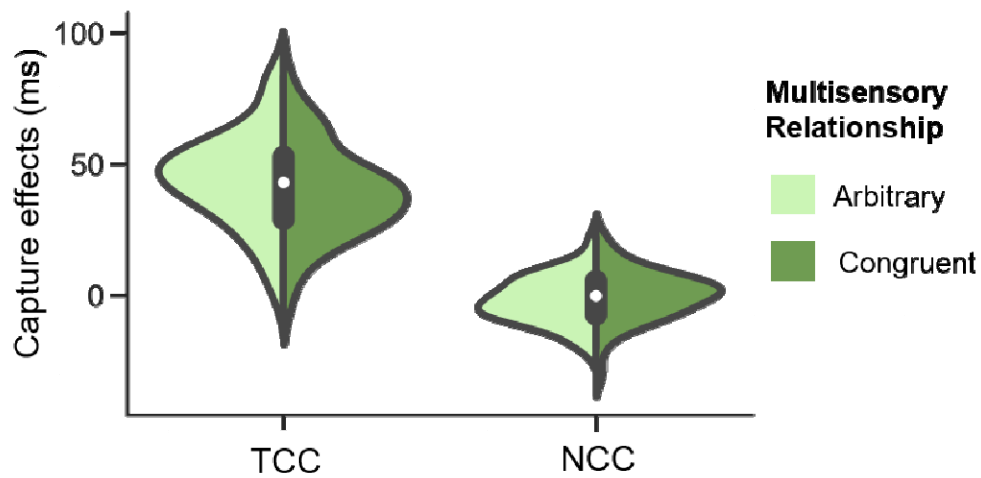

1642  
1643  
1644  
1645  
1646  
1647  
1648  
1649  
1650  
1651  
1652  
1653  
1654  
1655  
1656  
1657  
1658  
1659  
1660  
1661  
1662  
1663  
1664  
1665  
1666  
1667  
1668  
1669

Figure 3



1670

### Contralateral-Ipsilateral waveforms across experiments

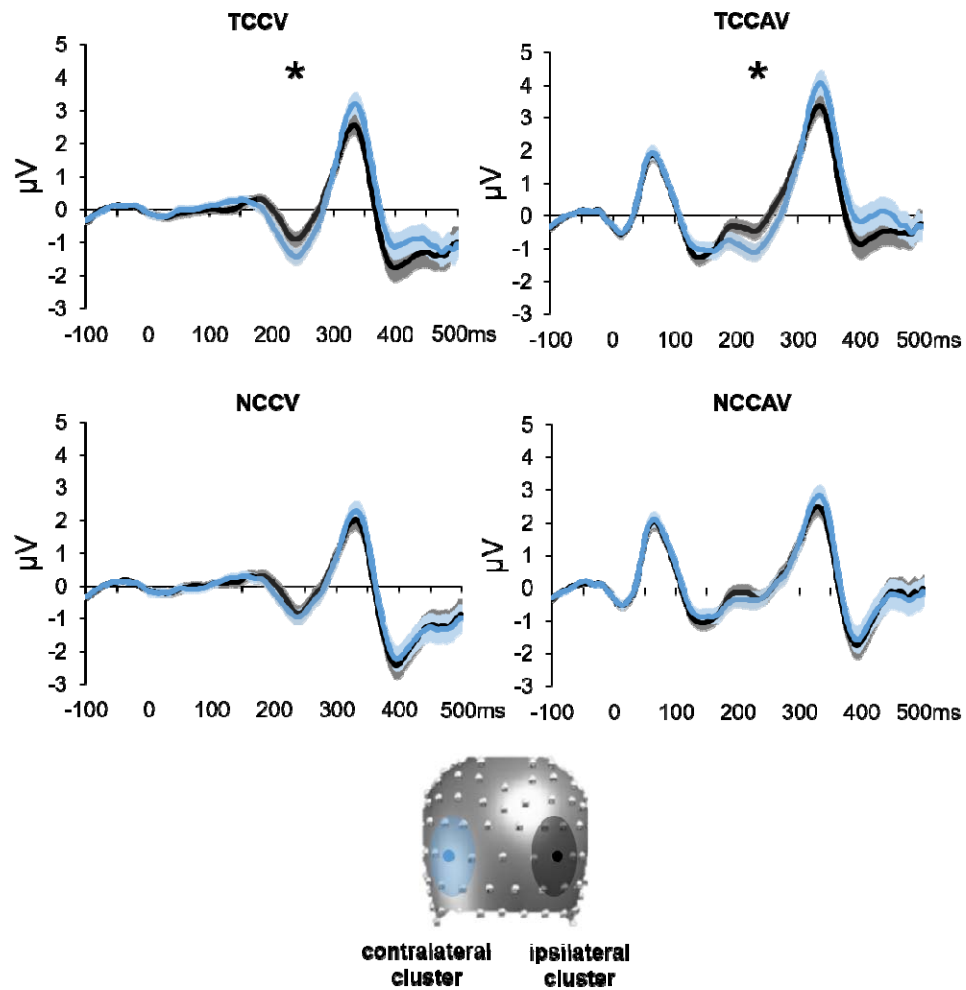

1671  
1672  
1673  
1674  
1675  
1676  
1677  
1678  
1679  
1680  
1681  
1682  
1683  
1684  
1685  
1686  
1687  
1688

Figure 4

1689  
1690  
1691

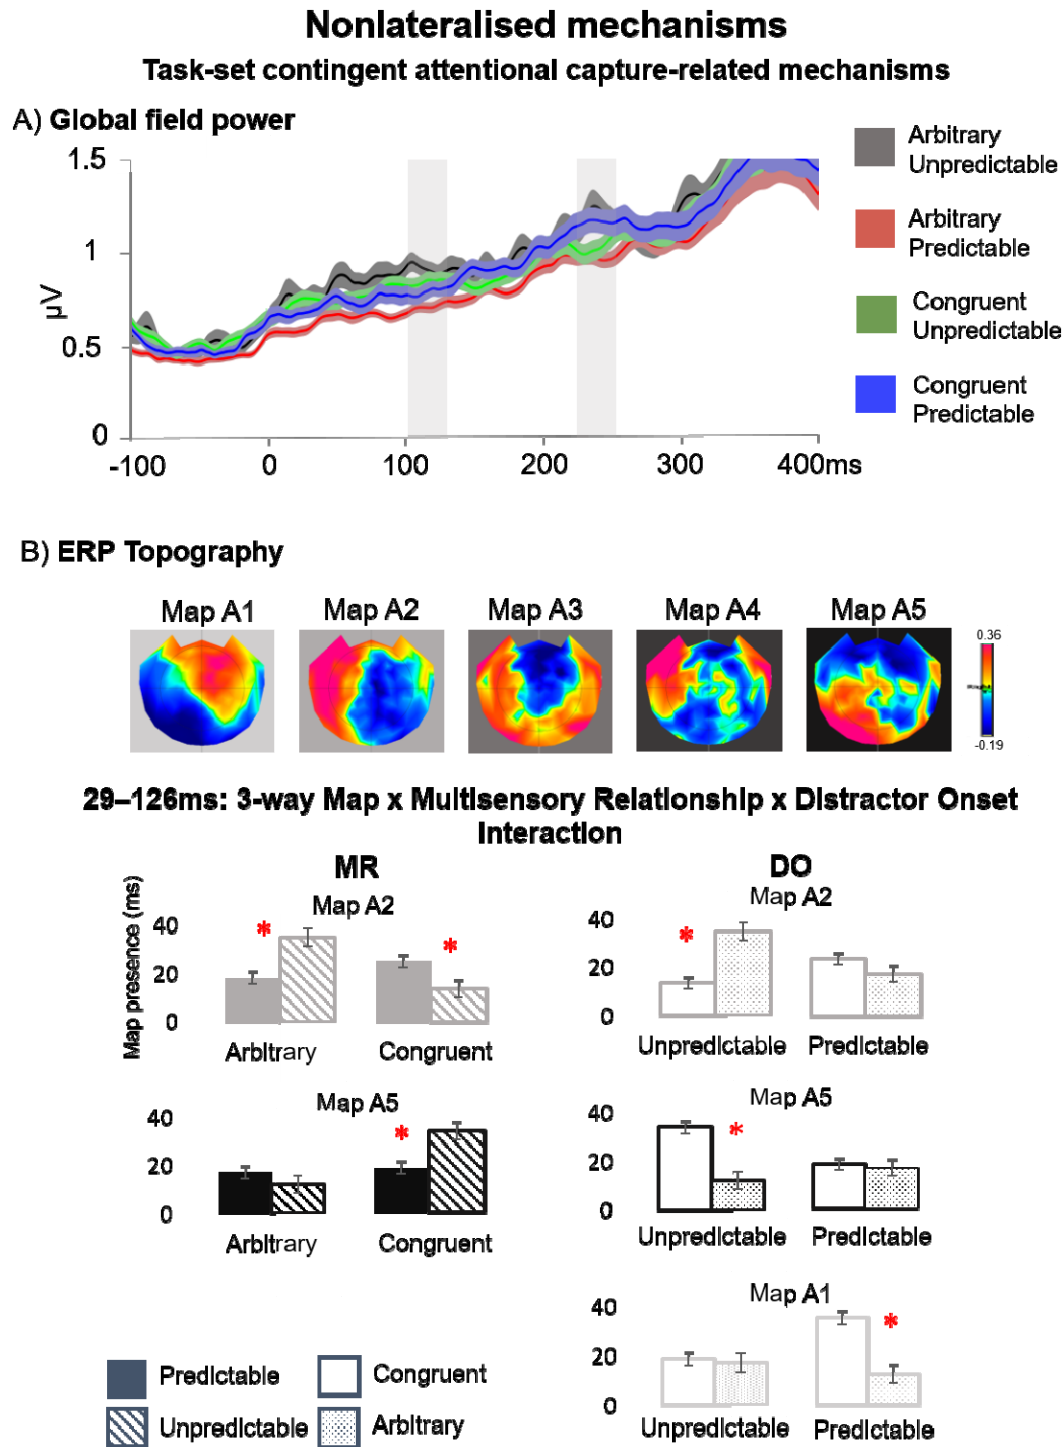

1692  
1693  
1694  
1695  
1696

Figure 5

## Nonlateralised mechanisms

### Multisensory enhancement-related mechanisms

#### A) Global field power

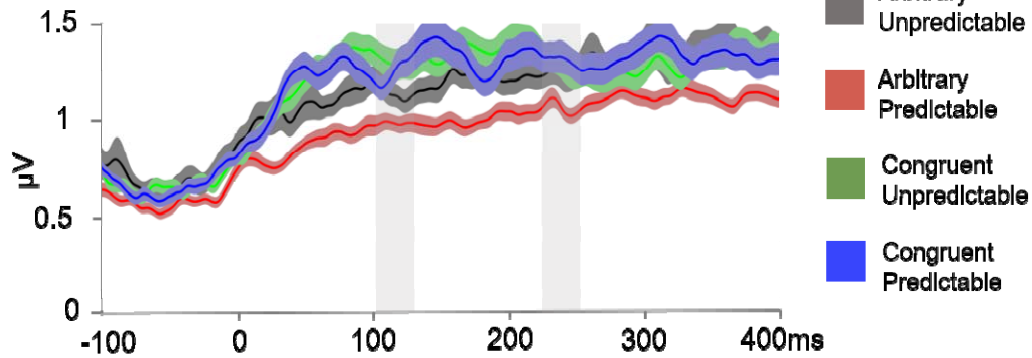

#### B) ERP Topography

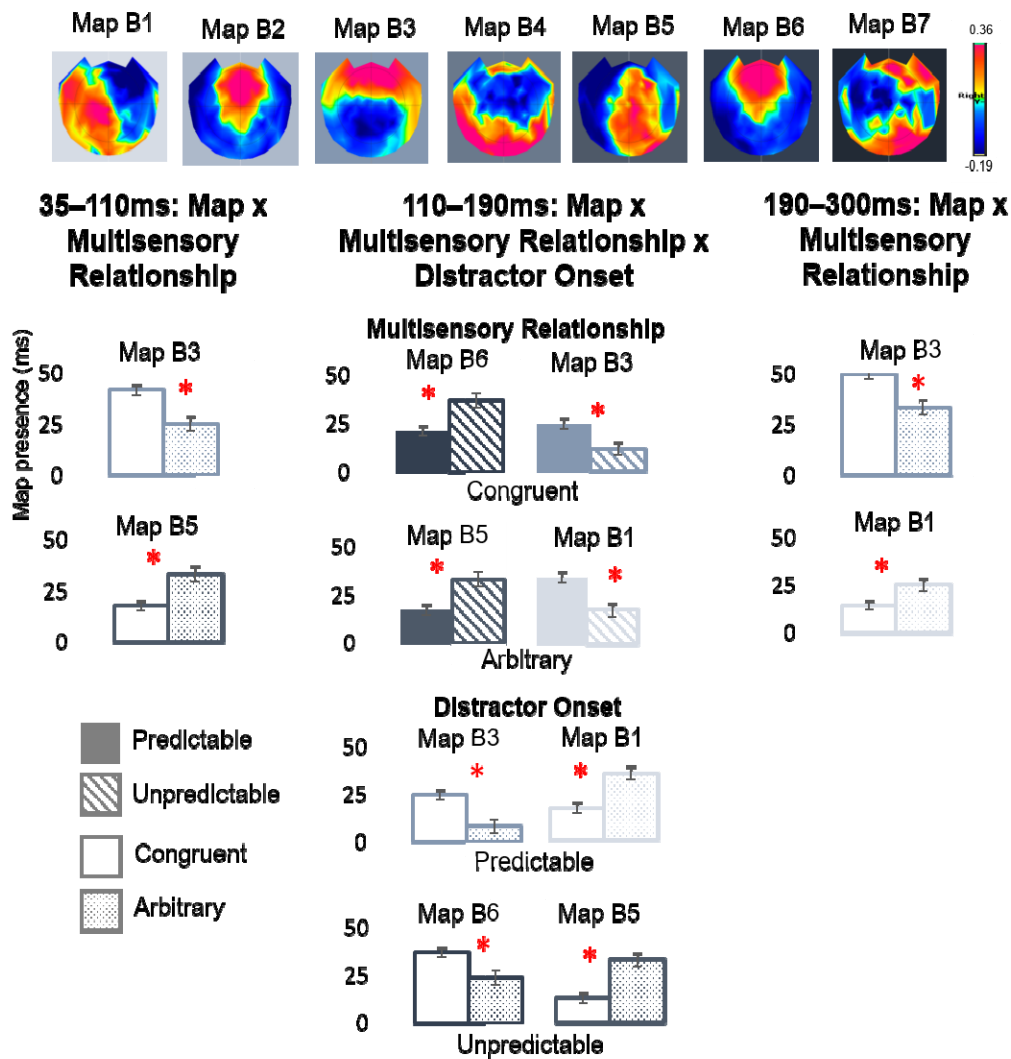

1697

1698 Appendix 1. Abbreviations

- 1699
- 1700 N2pc – the N2pc event-related component
- 1701 EEG – Electroencephalography
- 1702 ERPs – Event-Related Potentials
- 1703 TAC – Task-set Contingent Attentional Capture
- 1704 MSE – Multisensory Enhancement of Attentional Capture
- 1705 SOMs – Supplementary Online Materials
- 1706 TCCV – target-color cue visual
- 1707 NCCV – nontarget-color cue visual
- 1708 TCCAV – target-color cue audiovisual
- 1709 NCCAV – nontarget-color cue audiovisual
- 1710 rmANOVA – repeated-measures analysis of variance
- 1711 GFP – Global Field Power
- 1712 TAAHC – Topographic Atomize and Agglomerate Hierarchical Clustering
- 1713  $D_{AV}$  – Target Difference, difference between TCCAV and NCCAV conditions
- 1714  $D_V$  – Target Difference, difference between TCCV and NCCV conditions
- 1715 DO – Distractor Onset
- 1716 MR – Multisensory Relationship
